1 **High-dimensional characterization of IL-10 production and IL-10 dependent**  
2 **regulation during primary gammaherpesvirus infection**

3

4 Abigail K. Kimball<sup>1</sup>, Lauren M. Oko<sup>2</sup>, Rachael E. Kaspar<sup>1</sup>, Linda F. van Dyk<sup>2</sup>, and Eric T.  
5 Clambey<sup>1\*</sup>

6

7 <sup>1</sup> Department of Anesthesiology and <sup>2</sup>Department of Immunology and Microbiology,  
8 University of Colorado Denver, Anschutz Medical Campus, Aurora, CO 80045

9

10 \* Address correspondence and reprint requests to Dr. Eric T. Clambey, Department of  
11 Anesthesiology, School of Medicine, University of Colorado Anschutz Medical Campus,  
12 12700 E. 19<sup>th</sup> Ave., Box 112, Aurora, CO, 80045. E-mail address:

13 [Eric.Clambey@ucdenver.edu](mailto:Eric.Clambey@ucdenver.edu)

14

15

16 ORCIDs: 0000-0002-9831-386X (A.K.K.); 0000-0002-7125-7036 (L.M.O.); 0000-0002-  
17 1181-7919 (R.E.K.); 0000-0003-2662-5554 (L.F.v.D.); 0000-0002-7972-9544 (E.T.C.).

18

19 This work was funded by National Institutes of Health Grants R01 AI121300 and R01  
20 CA168558 (to L.F.v.D.), an American Heart Association National Scientist Development  
21 grant (#13SDG14510023), the Crohn's and Colitis Foundation of America (#311295), a  
22 pilot grant from the Lung, Head and Neck Cancer program within the University of  
23 Colorado Cancer Center, and a Career Enhancement Award from the University of

24 Colorado Lung Cancer Specialized Program of Research Excellence (P50CA58187) (all  
25 to E.T.C.).

26

27 The Lung, Head and Neck program within the University of Colorado Cancer Center,  
28 and the Flow Cytometry Shared Resource, are directly funded through support from the  
29 National Cancer Institute Cancer Center Support Grant P30CA046934.

30

31 Abbreviations used in this article: B6, C57BL/6; CyTOF, cytometry by time-of-flight;  
32  $\gamma$ HV68, murine gammaherpesvirus 68; IFN $\gamma$ , Interferon-gamma, IL-10, Interleukin-10;  
33 ICCS, Intracellular cytokine stain; KO, knockout; TNF $\alpha$ , tumor necrosis factor-alpha,  
34 tSNE, t-distributed stochastic neighbor embedding.

35 **ABSTRACT**

36 Interleukin (IL)-10 is a potent immunomodulatory cytokine produced by multiple  
37 cell types to restrain immune activation. Many herpesviruses have utilized the IL-10  
38 pathway to facilitate infection, but how endogenous IL-10 is regulated during primary  
39 infection in vivo remains poorly characterized. Here, we infected mice with murine  
40 gammaherpesvirus 68 ( $\gamma$ HV68) and analyzed the production, and genetic contribution,  
41 of IL-10 using mass cytometry, or cytometry by time-of-flight (CyTOF), analysis.  $\gamma$ HV68  
42 infection elicited a breadth of effector CD4 T cells in the lungs of acutely infected mice,  
43 including a highly activated effector subset that co-expressed IFN $\gamma$ , TNF $\alpha$ , and IL-10. By  
44 using IL-10 green fluorescent protein (gfp) transcriptional reporter mice, we identified  
45 that IL-10 was primarily expressed within CD4 T cells during acute infection in the lungs.  
46 IL10gfp expressing CD4 T cells were highly proliferative and characterized by the  
47 expression of multiple co-inhibitory receptors including PD-1 and LAG-3. When we  
48 analyzed acute  $\gamma$ HV68 infection of IL-10 deficient mice, we found that IL-10 limits the  
49 frequency of both myeloid and effector CD4 T cell subsets in the infected lung, with  
50 minimal changes at a distant mucosal site. These data emphasize the unique insights  
51 that high-dimensional analysis can afford in investigating antiviral immunity, and provide  
52 new insights into the breadth, phenotype and function of IL-10 expressing effector CD4  
53 T cells during acute virus infection.

## 54 INTRODUCTION

55           The gammaherpesviruses ( $\gamma$ HVs) are a group of large dsDNA lymphotropic  
56 viruses which include the human pathogens Epstein-Barr virus (EBV) and Kaposi's  
57 sarcoma associated herpesvirus (KSHV), and the small animal model murine  
58 gammaherpesvirus 68 ( $\gamma$ HV68) (1-3). The  $\gamma$ HVs establish a lifelong infection in their  
59 host, with most infections in immunocompetent hosts asymptomatic. In contrast,  
60 immunosuppressed individuals are at a significantly increased risk for the development  
61 of a variety of chronic pathologies, including  $\gamma$ HV-associated malignancies (4).

62            $\gamma$ HV infection is critically regulated by the immune system, and  $\gamma$ HVs have  
63 evolved numerous strategies to either subvert or avoid immune destruction, thereby  
64 facilitating lifelong infection (5-7). Among these, IL-10 is a multifunctional cytokine that  
65 downregulates the expression of multiple pro-inflammatory cytokines and cell surface  
66 molecules, and can influence a wide array of immune cell types (8-10). IL-10 is a  
67 frequent target of manipulation by the herpesviruses, with some  $\gamma$ HVs, like Epstein-Barr  
68 virus (EBV), encoding their own IL-10 homolog (11, 12), whereas other viruses,  
69 including murine gammaherpesvirus 68 ( $\gamma$ HV68), inducing cellular IL-10 (13). IL-10 has  
70 been reported to regulate multiple aspects of  $\gamma$ HV68 infection. For instance,  $\gamma$ HV68-  
71 infected IL-10 deficient mice fail to control leukocytosis, have greater splenomegaly and  
72 a reduced latent load (14), with these mice susceptible to an exacerbated inflammatory  
73 bowel disease (15). IL-10 has been reported to be induced in B cells by the  $\gamma$ HV68 M2  
74 gene product (13). IL-10 expressing CD8 T cells have also been observed during  
75 chronic  $\gamma$ HV68 infection in mice depleted for CD4 T cells, an immunosuppressive  
76 phenotype associated with chronic viral pathogenesis (16).

77           The above reports identified a clear role for IL-10 in shaping the outcome of  
78  $\gamma$ HV68 infection. Here we applied high-dimensional, single-cell analysis using mass  
79 cytometry (cytometry by time-of-flight, CyTOF) (17) to define the breadth and cellular  
80 phenotype of IL-10 expressing cells elicited during acute  $\gamma$ HV68 infection. We further  
81 analyzed the genetic impact of IL-10 in limiting  $\gamma$ HV68 induced inflammation. These  
82 studies demonstrate the acute impact of IL-10 on primary  $\gamma$ HV infection in vivo and  
83 define effector CD4 T cells as a major cell source of IL-10 during acute pulmonary  
84 infection.

## 85 MATERIALS AND METHODS

86

87 *Experimental samples.* Mice were obtained from the Jackson Laboratory and bred in-  
88 house at the University of Colorado, including the C57BL/6J (B6, Jax stock #000664),  
89 IL10-deficient (IL10KO, B6.129P2-*Il10*<sup>tm1Cgn</sup>/J, Jax stock #002251), or IL10gfp  
90 (B6.129S6-*Il10*<sup>tm1Flv</sup>/J, Jax stock #008379) genotypes. Mice were intranasally infected  
91 with  $4 \times 10^5$  plaque forming units (PFU) of wild-type (WT) murine gammaherpesvirus 68  
92 ( $\gamma$ HV68) in mice subjected to isoflurane induced anesthesia. Mice were used between 8-  
93 15 weeks of age, with experimental cohorts age- and sex-matched. Mice were infected  
94 with WT  $\gamma$ HV68 (strain WUMS, ATCC VR-1465) (18), using either bacterial artificial  
95 chromosome (BAC)-derived WT  $\gamma$ HV68 (19) or WT  $\gamma$ HV68.ORF73 $\beta$ la, which encodes a  
96 fusion between ORF73 and the beta-lactamase gene (20).  $\gamma$ HV68 was grown and  
97 titered by plaque assay on NIH 3T12 fibroblasts as previously published (21). Mice  
98 subjected to anti-CD3 antibody injection were injected intraperitoneally with 15  $\mu$ g of  
99 anti-CD3 $\epsilon$  antibody (clone 145-2C11, BioXcell, Cat# BP0001-1) at 0 and 46 hours, with  
100 spleens harvested at 50 hours post primary injection (22). Lung data in Figure 4 are  
101 from a previously published dataset (23). All procedures were performed under  
102 protocols approved by the Institutional Animal Care and Use Committee at the  
103 University of Colorado Anschutz Medical Campus.

104

105 *Cell processing & antibody staining.* In-depth processing and staining protocol can be  
106 found in (23). Briefly, lungs were perfused using 10-12 mL of phosphate buffered saline  
107 (PBS), harvested, minced and enzymatically digested with collagenase D for 1 h at

108 37°C. Lungs, and spleens, were further subjected to mechanical disruption to generate  
109 single-cell suspensions that were subjected to red blood cell lysis, and resuspended for  
110 staining. Colons were surgically dissected, rinsed then vortexed in PBS to remove fecal  
111 material, and incubated with PBS containing 15 mM HEPES, 1 mM EDTA at room  
112 temperature for 15 minutes while samples were vigorously vortexed, to remove  
113 intraepithelial lymphocytes. Colonic tissue was then rinsed over a sieve, washed with  
114 ice cold PBS, minced and subjected to enzymatic digestion using Collagenase VIII  
115 (100-200 units/mL final concentration, Sigma Aldrich) diluted in RPMI 1640 (Gibco)  
116 supplemented with 5% fetal bovine serum, 15 mM HEPES, and 1%  
117 penicillin/streptomycin. Enzymatic digestion was quenched using ice cold RPMI 1640  
118 with 5% fetal bovine serum. Colonic samples were washed with a 1:10,000 dilution of  
119 Benzonase® Nuclease ( $\geq 250$  units/ $\mu$ L, Sigma Aldrich) in RPMI 1640 to minimize cell  
120 aggregation, prior to staining with cisplatin as a live/dead discriminator. For samples  
121 analyzed for intracellular cytokine staining, cells were pharmacologically stimulated with  
122 PMA and ionomycin in the presence of the Golgi apparatus inhibitors brefeldin A and  
123 monensin for 5 hours. Cells were stained with cisplatin according to manufacturer's  
124 recommendations (Cell-ID™ Cisplatin, Fluidigm), incubated with Fc receptor blocking Ab  
125 (clone 2.4G2, Tonbo Biosciences) for 10-20 min, stained with primary surface Abs for  
126 30 min at 22°C or 15 min at 37°C and 15 min at 22°C. Secondary surface stains, to  
127 detect fluorophore conjugated antibodies, were incubated for 20-30 min, and washed,  
128 with intracellular staining done using the FoxP3 Fix/Perm Buffer kit (Thermo Fisher) for  
129 2 hours or overnight at 4°C. Following cell staining, cells were washed and resuspended  
130 in Intercalator (Cell-ID™ Intercalator-Ir). A subset of experiments (Figures 1, 3, 4B, 4D,

131 4F, and 5) were subjected to isotopic barcoding using the Fluidigm barcoding kit (Cell-  
132 ID™ 20-Plex Pd Barcoding Kit, Fluidigm) prior to staining with the primary surface  
133 stains. Antibodies used for these studies are listed in Tables 1-4B. All antibodies that  
134 were directly conjugated to isotopically purified elements were obtained from Fluidigm.  
135 In each of the CyTOF panels, a subset of antibodies were detected using a secondary  
136 detection approach, with FITC, PE, APC or Biotin-conjugated antibodies (clone and  
137 source identified in Tables 1-4B), detected using metal conjugated secondary  
138 antibodies against FITC, PE, APC or Biotin (Fluidigm).

139  
140 *CyTOF run and sample normalization/debarcoding.* Samples were collected on a Helios  
141 mass cytometer (Fluidigm), with samples resuspended with equilibration beads to allow  
142 for signal normalization, with the normalization software downloaded from the Nolan  
143 laboratory GitHub page (<https://github.com/nolanlab>) (as in (23)). For experiments  
144 where the samples were subjected to isotopic barcoding (Figures 1, 3, 4B, 4D, 4F, and  
145 5) the debarcoding software was used following normalization  
146 (<https://github.com/nolanlab/single-cell-debarcoder>). Normalized, debarcoded data were  
147 subjected to traditional Boolean gating in FlowJo, identifying singlets (<sup>191</sup>Iridium (Ir)+ <sup>193</sup>  
148 Ir+) that were viable (<sup>195</sup>Platinum(Pt)-). These events were then gated and exported for  
149 downstream analysis. Additional Boolean gating was later performed for either CD45+  
150 events or CD4+ T cell events, with gating criteria identified within each figure.

151  
152 *PhenoGraph-based data analysis.* Manually gated singlet (<sup>191</sup>Ir+ <sup>193</sup>Ir+) viable (<sup>195</sup>Pt-)   
153 events, or further gated populations, were imported into PhenoGraph, with relevant



154 clustering markers selected (28-35 cellular markers depending on the experiment; note  
155 that markers used for gating imported populations were not used for clustering). All  
156 parameters used for clustering are indicated in the associated Tables. PhenoGraph was  
157 run with the following settings: 1) files were merged using either the merge method  
158 “min” (Figure 1, Figure 2A, and Figure 3), all (Figure 2B), or “ceiling” (Figure 3-5), 2)  
159 files were transformed using the transformation method “cytofAsinh”, 3) the  
160 “Rphenograph” clustering method was chosen, coupled with the “tSNE” visualization  
161 method. All other settings were automatically chosen, using default PhenoGraph  
162 settings.

163

164 *PhenoGraph-based visualization.* PhenoGraph-defined clusters were displayed on tSNE  
165 plots within the R package “Shiny” (23). Within the “Shiny” application, cluster color was  
166 altered or colored according protein expression. Multiple .csv files were produced by  
167 PhenoGraph, including “cluster median data” and “cluster cell percentage,” which were  
168 used to determine cluster phenotype, distribution between conditions, and statistical  
169 significance between groups.

170

171 *Software used and statistical analysis.* Software for data analysis included: R studio  
172 (Version 1.1.453), downloaded from the official R website (<http://www.r-project.org/>); the  
173 Cytokit package (Version 3.7), downloaded from Bioconductor  
174 (<https://Bioconductor.org/packages/release/bioc/html/cytokit.html>), Excel 16.15, FlowJo  
175 10.4.2, GraphPad Prism 7.0c, and Adobe Illustrator CC 22.1. Cytokit was opened using  
176 R studio and XQuartz. Statistical significance was tested in GraphPad Prism using an

177 unpaired t test, with statistical significance as identified. For contexts in which we tested  
178 statistical significance across all of the identified nodes/clusters (Fig. 4, 5), statistical  
179 analysis was subjected to multiple comparison correction in GraphPad Prism.

180 **RESULTS**

181

182 ***High-dimensional analysis of effector CD4 T cells during primary  $\gamma$ HV68 infection.***

183  $\gamma$ HV68 infection induces diverse effector CD4 T cell subsets throughout the course of  
184 infection (24). To provide a high-dimensional analysis of effector CD4 T cell function  
185 during primary infection, the lungs from  $\gamma$ HV68 infected mice were harvested at 9 days  
186 post-infection (dpi), subjected to pharmacological stimulation with PMA and ionomycin,  
187 and analyzed by mass cytometry using a panel of 35 isotopically purified, metal  
188 conjugated antibodies (Table 1). CD4 T cells were initially analyzed for expression of  
189 IFN $\gamma$  and TNF $\alpha$  expression, two hallmark effector cytokines elicited in antiviral CD4 T  
190 cells. Between 40-60% of CD4 T cells harvested from infected lungs expressed either  
191 IFN $\gamma$ , TNF $\alpha$ , or co-expressed IFN $\gamma$  and TNF $\alpha$  (Fig. 1A). IFN $\gamma$ +TNF $\alpha$ + effector CD4 T  
192 cells were more frequent than either IFN $\gamma$ + or TNF $\alpha$ + single positive cells (Fig. 1A). To  
193 gain an unbiased perspective on the phenotypic diversity within these cytokine-defined  
194 effector CD4 T cells, we next subjected these cell populations to the PhenoGraph  
195 algorithm, to define cell clusters present in each cytokine-defined subset (25). By  
196 clustering cells based on the expression of 30 proteins (including CD44, Tbet, IRF4 and  
197 multiple co-inhibitory receptors, but not on CD3, CD4, MHCII, IFN $\gamma$  or TNF $\alpha$ ) (Table 1),  
198 PhenoGraph defined 16 CD4 T cell clusters present in the virally infected lung (Fig. 1A-  
199 B). The relative frequency of these cell clusters was notably affected by whether cells  
200 expressed cytokines, and if so, which cytokines. Some clusters, depicted by shades of  
201 gray in Fig. 1B, were present in relatively comparable frequencies across all subsets of  
202 CD4 T cells, regardless of whether they expressed TNF $\alpha$  or IFN $\gamma$  (e.g. cluster #10, a

203 population of CD4 T cells characterized by intermediate expression of GITR, PD-1 and  
204 ICOS, Fig. 1C). In contrast, cluster #9 (depicted in black, Fig. 1B-C) contained CD44<sup>high</sup>  
205 IRF4<sup>mid</sup> IL-2+ cells that were never found among the IFN $\gamma$ -TNF $\alpha$ - subset of CD4 T cells.  
206 Beyond these distinctions, there were two classes of cell clusters that were inversely  
207 related: i) clusters enriched among IFN $\gamma$ - CD4 T cells (depicted in pastel colors), and ii)  
208 clusters enriched among IFN $\gamma$ + CD4 T cells (depicted in saturated colors, Fig. 1B-C).  
209 Clusters enriched among IFN $\gamma$ - cells were primarily CD44<sup>low</sup> with limited expression of  
210 notable phenotypic markers (Fig. 1C). Conversely, clusters enriched among IFN $\gamma$ +  
211 subsets (IFN $\gamma$ + or IFN $\gamma$ + TNF $\alpha$ +; clusters 8, 12 and 16) included: i) cluster #16, a  
212 Tbet<sup>high</sup> Lag3<sup>high</sup> IRF4<sup>high</sup> PD-1<sup>high</sup> GITR+ CD25+ CTLA4+ ICOS+ population and ii)  
213 cluster #8, a Tbet<sup>intermediate</sup> IRF4<sup>high</sup> IL-10<sup>high</sup> GITR+ CTLA4+ PD-1+ ICOS+ population  
214 (Fig. 1C). These data demonstrate that  $\gamma$ HV68 elicits a diverse set of CD4 T cells during  
215 primary infection, including the induction of an IFN $\gamma$ + IL-10+ effector CD4 T cell subset.

216

### 217 ***High-dimensional analysis of IL-10 expression as defined by an IL-10***

218 ***transcriptional reporter.*** Our initial analysis focused on the phenotypic diversity of  
219 CD4 T cells elicited during virus infection, where we identified a prominent IL-10  
220 producing effector CD4 T cell subset (cluster #8, Fig. 1C). To gain a broader  
221 perspective on IL-10 expressing cells during primary virus infection, we next infected IL-  
222 10 transcriptional reporter mice, in which the enhanced GFP gene is inserted 3' of the  
223 endogenous Il10 gene (i.e. mice expressing the IL-10 *tiger* allele (26)).  $\gamma$ HV68 infected  
224 lungs were harvested at 6 dpi and subjected to mass cytometric analysis, where  
225 samples were stained with a metal-conjugated, anti-GFP antibody to detect the IL-10

226 reporter (Table 2). As anticipated,  $\gamma$ HV68 infection resulted in prominent changes in the  
227 frequency and distribution of PhenoGraph-defined clusters relative to mock infected  
228 lungs (Fig. 2A). When we analyzed the cellular distribution of the IL10gfp reporter,  
229 IL10gfp expression was detected in a fraction of cells in infected lungs, primarily within  
230 CD4 T cells (Fig. 2A).

231 Infection of IL-10 transcriptional reporter mice afforded a major advantage over  
232 ICCS, as it measured IL-10 mRNA expression without the need for additional  
233 pharmacologic stimuli which can alter cellular phenotype. We therefore focused on CD4  
234 T cell phenotypes in either mock or virally-infected lungs using the PhenoGraph  
235 clustering algorithm, which identified 16 CD4 T cell clusters across mock and  $\gamma$ HV68  
236 infected lungs. Virally-infected lungs had an increased number of CD4 T cells relative to  
237 mock-infection, with a pronounced shift in CD4 T cell clusters (Fig. 2B) towards a  
238 prominent CD44<sup>high</sup> Ki67<sup>high</sup> ICOS<sup>high</sup> PD-1<sup>high</sup> population (Fig. 2C). Within these virally-  
239 elicited effector CD4 T cells, Lag3, Ly6C, and CD49b expression were expressed in  
240 partially overlapping cell subsets (Fig. 2C). IL10gfp expression was detected in a subset  
241 of virally-elicited effector CD4 T cells (Fig. 2C), specifically cluster #1 and #5 (Fig. 2D).  
242 IL10gfp+ CD4 T cells between these two clusters shared a conserved CD44<sup>high</sup> Ki67<sup>high</sup>  
243 ICOS<sup>+</sup> PD-1<sup>high</sup> Lag3<sup>high</sup> CD49b<sup>mid</sup> phenotype, with Ly6C<sup>high</sup> and Ly6C<sup>low</sup> subsets. These  
244 studies, using an IL-10 transcriptional reporter, demonstrate that CD4 T cells are a  
245 primary source of IL-10 expression during acute  $\gamma$ HV68 infection and further identify a  
246 core phenotype associated with IL-10 expression within effector CD4 T cells.

247

248 ***γHV68 infection elicits a dominant IL10gfp expressing CD4 T cell population that***  
249 ***differs from anti-CD3 antibody elicited IL10gfp expressing CD4 T cells.*** Multiple  
250 CD4 T cell subsets can produce IL-10, including type 1 regulatory CD4 T cells, a  
251 FoxP3- IL-10+ subset of CD4 T cells reported to co-express the cell surface proteins  
252 Lag3 and CD49b (22). Based on the expression of Lag3 and CD49b in IL-10 expressing  
253 CD4 T cells (Fig. 2C-D), we sought to compare how these cells compare to Tr1 cells  
254 generated by an established method. One published method to elicit Tr1 cells is the  
255 repeated injection of anti-CD3 antibody into mice, a method associated with both  
256 polyclonal T cell activation and the generation of Tr1 cells (22). In this context, Tr1 cells  
257 are found especially in the small intestine, with a lower induction of these cells in other  
258 tissues (26). To understand how virally induced IL-10+ CD4 T cells compare to IL-10+  
259 CD4 T cells elicited following anti-CD3 antibody injection, we compared CD4 T cells  
260 from the lungs of  $\gamma$ HV68 infected mice with CD4 T cells from the spleens of mice  
261 repeatedly injected with anti-CD3 antibody. Cells were harvested and subjected to mass  
262 cytometric analysis using a panel of 34 antibodies (Table 3). When CD4 T cells from  
263 these two conditions were subjected to the PhenoGraph algorithm, we identified 20  
264 clusters of CD4 T cells (Fig. 3A). tSNE plots of CD4 T cells for each condition revealed  
265 largely non-overlapping cell clusters, suggesting phenotypic divergence (Fig. 3A).  
266 Across both conditions, five of twenty CD4 T cell clusters had above average  
267 expression of IL10gfp (Fig. 3B). There were large differences in the frequency of  
268 IL10gfp+ cells among CD4 T cells between conditions, with ~10% of CD4 T cells that  
269 were IL10gfp+ in the spleens of anti-CD3 antibody injected mice and ~50% of CD4 T  
270 cells that were IL10gfp+ in  $\gamma$ HV68 infected lungs (Fig. 3C). When we analyzed the

271 phenotype of IL10gfp+ clusters between these two conditions, we found a significant  
272 phenotypic divergence. Within anti-CD3 antibody injected mice, the highest frequency of  
273 IL10gfp+ cells were found within a FoxP3+ regulatory T cell (Treg) cluster (Fig. 3D). In  
274 contrast, IL10gfp+ clusters that were dominant in  $\gamma$ HV68 infection were CD44<sup>high</sup>  
275 Lag3<sup>high</sup> PD-1<sup>high</sup> Tbet+ and FoxP3-, suggesting they may be either Tr1 or Th1 cells  
276 (Fig. 3D). These data emphasize the multiple potential cellular sources of IL-10 that can  
277 occur with diverse stimuli, and reveal that virus infection elicits a distinct effector T cell  
278 phenotype when compared to anti-CD3 antibody injection.

279

280 ***IL-10 dependent regulation of  $\gamma$ HV68 infection.*** To define how IL-10 regulates the  
281 distribution and phenotype of immune cell subsets during  $\gamma$ HV68 infection we used  
282 mass cytometry to compare cellular composition and phenotype between  $\gamma$ HV68  
283 infected wild-type (B6) and IL-10 deficient (IL10KO) mice. This analysis focused on  
284 cellular diversity among hematopoietic (CD45+) cells within the lungs and colon, with  
285 tissues harvested from separate cohorts. Mass cytometry data were collected and  
286 subjected to the PhenoGraph algorithm for clustering analysis. This analysis identified  
287 29 cell clusters in lungs harvested from  $\gamma$ HV68 infected mice, with 20 cell clusters  
288 identified in the colons of  $\gamma$ HV68 infected mice (Fig. 4A-B). Cell clusters were further  
289 defined based on canonical lineage markers, to quantify the frequencies of distinct  
290 leukocyte populations (Fig. 4C-D). When we compared cluster distribution between B6  
291 and IL10KO mice, we found pronounced shifts in cellular distribution between B6 and  
292 IL10KO infected lungs, particularly among CD4 T cells (Fig. 4C). In contrast, colons  
293 from virally-infected mice had a very limited number of changes in cell clusters at this

294 time post-infection (Fig. 4D). Among the cell clusters present in infected lungs, IL10KO  
295 mice had a significantly increased frequency in two cell clusters: i) PD-1+ Lag3+ CD4 T  
296 cells (cluster #14), and ii) a small, but significant, increase in CD64+ cells (cluster #25)  
297 (Fig. 4E). Colons from infected IL10KO mice had a selective increase in the frequency  
298 of CD64+ cells characterized by a CD11b+ CD11c+ phenotype with variable CD103  
299 expression (cluster #13) (Fig. 4F). Cluster #13 was unique among CD64+ clusters in  
300 CD11c and CD103 expression relative to other CD64+ clusters in the colon (Fig. 4F).  
301 These findings suggest that during acute  $\gamma$ HV68 infection that IL-10 constrains the  
302 expansion and/or survival of effector CD4 T cells in the lung, and further constrains the  
303 frequency of CD64+ mononuclear phagocytic cells in both the lung and the colon.

304

305 ***IL-10 dependent regulation of effector CD4 T cell function during acute  $\gamma$ HV68***  
306 ***infection.*** Next, we sought to define how IL-10 regulates CD4 T cell effector function  
307 during acute  $\gamma$ HV68 infection, as revealed by intracellular cytokine staining analysis. We  
308 compared CD4 T cell function between  $\gamma$ HV68 infected B6 and IL10KO mice by ICCS  
309 using mass cytometry. In contrast to the clustering analysis done in Fig. 1, CD4 T cells  
310 for both genotypes were subjected to PhenoGraph-defined clustering using 32 markers  
311 including IFN $\gamma$ , TNF $\alpha$  and IL-10 (Table 1), identifying 16 unique clusters (Fig. 5A). CD4  
312 T cells were predominantly CD44<sup>high</sup>, consistent with a large effector CD4 T cell  
313 population in virally-infected lungs at this time (Fig. 5B). 7 of the 16 PhenoGraph-  
314 defined clusters showed expression of either IFN $\gamma$ , TNF $\alpha$  and/or IL-10 (Fig. 5B), with  
315 phenotypes ranging from single expression of IFN $\gamma$ + or TNF $\alpha$ +, coexpression of IFN $\gamma$ +  
316 and TNF $\alpha$ +, and triple expression of IFN $\gamma$ + TNF $\alpha$ + and IL-10+ (Fig. 5B-C). When we



317 analyzed the frequency of CD4 T cells stratified by cytokine expression, we found that  
318 B6 and IL10KO mice had comparable frequencies of TNF $\alpha$ + single positive and IFN $\gamma$ +  
319 single positive CD4 T cells (Fig. 5C-D). As anticipated, IL10KO mice had no detectable  
320 IL-10+ CD4 T cells (Fig. 5C-D). B6 mice had a significantly increased frequency of  
321 cytokine negative CD4 T cells (IFN $\gamma$ - TNF $\alpha$ - IL-10-) relative to IL10KO mice (Fig. 5C-D).  
322 In contrast, IL10KO mice had a significantly increased frequency of IFN $\gamma$ + TNF $\alpha$ +  
323 effector CD4 T cells (Fig. 5C-D). While IL10KO mice had an increased frequency of  
324 IFN $\gamma$ + TNF $\alpha$ + CD4 T cells relative to B6 mice, both genotypes had phenotypic diversity  
325 within this cytokine producing subset, including cell subsets with partially overlapping  
326 expression of CTLA-4, GITR, ICOS, Lag3 and PD-1 (Fig. 5E). These data demonstrate  
327 that IL-10 constrains the magnitude of highly activated IFN $\gamma$ + TNF $\alpha$ + effector CD4 T  
328 cells during acute  $\gamma$ HV68 infection, a population characterized by heterogeneous  
329 expression of CTLA-4, GITR, ICOS, Lag3 and PD-1.

## 330 **DISCUSSION**

331 IL-10 is a multifunctional cytokine that critically shapes the magnitude and  
332 activation status of the immune system in response to infection. In addition to its host  
333 immunomodulatory functions, IL-10 is a frequent target of viral manipulation by the  
334 herpesviruses (12, 13). Here we sought to investigate how  $\gamma$ HV68, a small animal model  
335 of gammaherpesvirus infection, intersects with IL-10, both in terms of what cells  
336 produce IL-10 and how the overall immune response is influenced by IL-10 during acute  
337 infection. For these studies, we have focused on acute, primary infection with  $\gamma$ HV68,  
338 seeking new insights through the use of high-dimensional mass cytometry (CyTOF)  
339 analyses.

340 IL-10 is known to be produced by a large number of cell types, including CD4  
341 and CD8 T cell subsets and B cells (8). Here we make use of IL-10eGFP transcriptional  
342 reporter mice, and direct intracellular staining for IL-10 protein, to identify CD4 T cells as  
343 a primary source of IL-10 production during acute  $\gamma$ HV68 infection in the lung. IL-10+  
344 CD4 T cells elicited during viral infection were associated with a highly activated effector  
345 phenotype, characterized by high expression of CD44 with co-expression of the  
346 cytokines IFN $\gamma$  and TNF $\alpha$ . IL10gfp+ CD4 T cells were proliferating and characterized by  
347 expression of PD-1, Lag3, ICOS, CD49b with variable expression of Ly6C. By querying  
348 these cellular phenotypes using mass cytometry, we have further analyzed IL10gfp  
349 expression across a wide range of leukocyte subsets. These studies demonstrated  
350 focused expression of IL-10 within CD4 T cells in the infected lung with minimal IL-10  
351 expression in other cell subsets at this time.

352           The expression of IL-10 within this highly activated effector CD4 T cells raises  
353 the question of what effector subset(s) express IL-10 in this context. Our data  
354 demonstrate that FoxP3<sup>+</sup> Tregs are not a prominent source of IL-10 during acute  $\gamma$ HV68  
355 infection in the lung. Instead, IL-10<sup>+</sup> CD4 T cells appear to be either: 1) type 1  
356 regulatory T cells, an IL-10 expressing, FoxP3 negative subset of CD4 T cells frequently  
357 characterized by co-expression of CD49b and Lag3 (22), or 2) an IL-10 expressing Th1  
358 subset (27-29). While these cells co-express CD49b and Lag3, a proposed marker of  
359 Tr1 cells (22), recent studies have emphasized that co-expression of CD49b and Lag3  
360 is not a definitive marker of Tr1 cells (30, 31). Conversely, IFN $\gamma$ <sup>+</sup> Th1 cells have been  
361 reported to express IL-10 in a variety of settings (32), and  $\gamma$ HV68 induced IL-10<sup>+</sup>  
362 effectors express the canonical Th1 transcription factor Tbet. Despite these  
363 observations, at this time there remains no definitive marker that discriminates between  
364 Tr1 and Th1 cells. Alternatively, these IFN $\gamma$ <sup>+</sup> IL-10<sup>+</sup> expressing cells may represent a  
365 distinct effector CD4 T cell subset (33). Recently, Eomesodermin was identified as a  
366 transcriptional regulator for IL-10<sup>+</sup> effector CD4 T cells, in both Tr1 cells (30) and a  
367 potentially distinct IFN $\gamma$ <sup>+</sup> IL-10<sup>+</sup> effector CD4 T cell (34). Whether IL-10<sup>+</sup> CD4 T cells  
368 elicited during  $\gamma$ HV68 infection express, and require, Eomesodermin remains to be  
369 tested.

370           IL-10 regulates its effects through signals transduced by the heterodimeric IL-10  
371 receptor, targeting both myeloid and non-myeloid cells (9). High-dimensional analysis of  
372 the immune response after  $\gamma$ HV68 infection identified a wide spectrum of cells in  
373 infected lung and colon, a phenotypic diversity readily characterized through use of the  
374 PhenoGraph clustering algorithm and visualized by the tSNE data dimensionality

375 method. When we compared cellular and phenotypic diversity between B6 and IL10KO  
376 mice, we found a pronounced increase in the frequency of a PD-1+ Lag3+ CD4 T cell  
377 subset and an exaggerated induction of IFN $\gamma$ + TNF $\alpha$ + effector CD4 T cells. We further  
378 found evidence for changes in CD64+ populations in both the infected lung and colon.  
379 While IL-10 may directly regulate effector CD4 T cell function (35, 36), CD4 T cell  
380 differentiation and effector function may also occur due to altered myeloid function(s) (8,  
381 10, 37, 38). Future studies using targeted disruption of IL-10 signaling in myeloid cells  
382 (e.g. macrophages, dendritic cells) and T cells will be required to determine whether IL-  
383 10 directly or indirectly modulates effector CD4 T cell differentiation during  $\gamma$ HV68  
384 infection. Regardless of the molecular basis of this phenotype, the increased frequency  
385 of PD-1+ Lag3+ effector CD4 T cells in IL-10 deficient mice suggests that co-inhibitory  
386 receptor expression may function as a compensatory mechanism to constrain  
387 pathogenic CD4 T cell function in the absence of IL-10.

388         Beyond insights on IL-10 dependent regulation during  $\gamma$ HV68 infection, these  
389 studies demonstrate the power of high-dimensional approaches such as mass  
390 cytometry to investigate the regulation of the immune response at a global level. By  
391 applying mass cytometry to CD4 T cells, our studies provide direct evidence for  
392 extensive phenotypic diversity of antiviral effector CD4 T cells elicited during primary  
393 viral infection. We anticipate that future studies, integrating mass cytometry with host  
394 and viral genetics, will afford new insights into the underpinnings of antiviral CD4 T cell  
395 function from a high-dimensional perspective.

396 **FIGURE LEGENDS**

397

398 **Figure 1. High-dimensional analysis of CD4 T cells elicited during primary  $\gamma$ HV68**

399 **infection.** Mass cytometric analysis of cells recovered from the lungs of  $\gamma$ HV68 infected

400 C57BL/6J (B6) mice at 9 dpi, subjected to intracellular cytokine staining (ICCS)

401 analysis, using a 35 antibody panel (Table 1). Data were gated on viable CD4 T cells,

402 defined as  $^{191}\text{Ir}+$   $^{193}\text{Ir}+$   $^{195}\text{Pt}-$   $^{152}\text{CD3}\epsilon+$   $^{172}\text{CD4}+$   $^{174}\text{MHC II}-$  events, where numbers

403 indicate isotopic mass for each measured parameter. (A) Analysis of  $\text{IFN}\gamma$  and  $\text{TNF}\alpha$

404 production from CD4 T cells subjected to pharmacologic stimulation with PMA and

405 ionomycin. The mean  $\pm$  SEM for each population is identified in each quadrant. Events

406 in each quadrant were further analyzed using the PhenoGraph algorithm and plotted

407 using the tSNE dimensionality reduction algorithm. Events were imported into

408 PhenoGraph and clustered on 8,320 events total and 30 markers (clustering parameters

409 identified in Table 1). In total 16 clusters were identified, with clusters colored by cluster

410 ID and displayed on tSNE plots. (B) Distribution of PhenoGraph-defined clusters within

411 CD4 T cells, stratified by expression of  $\text{IFN}\gamma$  and  $\text{TNF}\alpha$ . Each pie chart is subdivided

412 into clusters that are equally represented in  $\text{IFN}\gamma-$  and  $\text{IFN}\gamma+$  CD4 T cells (shades of

413 gray), clusters that are enriched in  $\text{IFN}\gamma-$  CD4 T cells (pastel colors), clusters that are

414 enriched only in cytokine producing CD4 T cells (black), and clusters that are enriched

415 in  $\text{IFN}\gamma+$  CD4 T cells (saturated colors) as defined in the key. Right panel shows events

416 depicted using tSNE, where each cluster is colored according to the cytokine profile

417 subsets (see key). (C) Phenotypic marker expression (in columns) of PhenoGraph-

418 defined clusters (in rows), stratified by their enrichment as a function of cytokine profile.

419 Clusters are stratified as in panel B. Data are from virally infected B6 lungs (n=4 mice)  
420 harvested 9 dpi, with cells stimulated with PMA and ionomycin for five hours prior to  
421 antibody staining.

422

423 **Figure 2. High-dimensional analysis of IL10gfp expression during acute  $\gamma$ HV68**

424 **infection in the lung.** Mass cytometric analysis of cells recovered from the lungs of

425  $\gamma$ HV68 infected IL10gfp mice at 6 dpi. Files were normalized, with events gated on (A)

426 total viable, single cells (defined as  $^{191}\text{Ir}+$   $^{193}\text{Ir}+$   $^{195}\text{Pt}-$ ) or (B-D) viable, CD4+ T cells

427 (defined as  $^{191}\text{Ir}+$   $^{193}\text{Ir}+$   $^{195}\text{Pt}-$   $^{152}\text{CD3}\epsilon+$   $^{172}\text{CD4}+$   $^{174}\text{MHC II}-$ ) prior to analysis, where

428 numbers indicate isotopic mass for each measured parameter. (A) PhenoGraph

429 analysis of cellular phenotypes in mock and virally-infected lung (28,924 events total),

430 clustered based on 29 markers (Table 2), identified 34 unique clusters, with cluster

431 phenotype defined according to the indicated lineage markers. The “CD45+” cluster was

432 defined by its expression of CD45+ and absence of other lineage defining markers. The

433 right panel of A shows all viable, singlet events from mock- and virally-infected lungs,

434 with events colored according to IL10gfp expression. The green boundary line defines

435 CD4+ T cells. (B) Mass cytometric analysis and PhenoGraph-based cell clustering of

436 CD4+ T cells (5,464 events total, clustered based on 26 markers, excluding CD3, CD4,

437 and MHC II, Table 2). In total 16 unique clusters were identified, visualized on a tSNE

438 plot (left). The number and frequency of CD4 T cell clusters is shown in the right panel,

439 with pie charts sized proportionally to the relative cell number of CD4 T cells in mock or

440 virus infected lung. (C) Phenotypic analysis of CD4 T cells, with events predominantly in

441 mock infection denoted with a gray boundary and events predominantly in virus

442 infection denoted with a red boundary. Data depict CD4 T cells plotted according to  
443 tSNE1 and tSNE2, as in panel B, with individual plots depicting relative protein  
444 expression for the identified marker portrayed by color intensity, with range of  
445 expression indicated on the bottom of each panel. Panels are ordered based on the  
446 frequency of positive events. (D) Summary of CD4 T cell clusters (in columns) that differ  
447 between mock and  $\gamma$ HV68 infected lungs, with protein expression denoted in rows (gray  
448 shading scaled relative to expression level). Data are from the lungs of a mock- or  
449  $\gamma$ HV68-infected mouse harvested at 6 dpi, with panel D quantifying the frequency of  
450 events in each cluster as a percentage of CD4+ T cells.

451

452 **Figure 3.  $\gamma$ HV68 infection elicits a dominant IL10gfp expressing CD4 T cell**  
453 **population that differs relative to IL10gfp expressing CD4 T cells in anti-CD3**  
454 **antibody injected mice.** Mass cytometric analysis of cells recovered from IL10gfp  
455 mice, comparing CD4 T cell phenotypes between the spleens of anti-CD3 antibody  
456 injected mice with the lungs of  $\gamma$ HV68 infected mice harvested at 6 dpi. Files were  
457 normalized and gated on viable, CD4+ T cells (defined as  $^{191}\text{Ir}^+ \text{ }^{193}\text{Ir}^+ \text{ }^{195}\text{Pt}^- \text{ }^{152}\text{CD}3\epsilon^+ \text{ }^{172}\text{CD}4^+ \text{ }^{209}\text{MHC II}^-$ ) prior to analysis, where numbers indicate isotopic mass for each  
458 measured parameter. (A) PhenoGraph analysis of CD4 T cells, comparing anti-CD3  
459 antibody injected versus  $\gamma$ HV68 infected samples (75,483 events total, clustered on 33  
460 markers, excluding CD3, CD4, and MHC II, Table 3), identified 20 unique clusters, each  
461 denoted with a distinct color. (B) PhenoGraph-defined CD4 T cell clusters were ranked  
462 based on IL10gfp expression, with 5 clusters having higher than average IL10gfp  
463 expression identified in red text. Figure insets depict all events from panel A, colored  
464

465 according to (left panel) IL10gfp expression, or (right panel) cluster ID for 5 IL10gfp+  
466 clusters. (C) The frequencies of CD4 T cell clusters are shown for both conditions, with  
467 focused analysis on the distribution of IL10gfp+ clusters identified by shaded gray  
468 extensions and pie charts on either side. Pie charts denote the frequencies of IL10gfp+  
469 events in each condition, with pie charts sized according to the relative number of  
470 IL10gfp+ events present in each condition. (D) Comparison of median protein  
471 expression within IL10gfp+ CD4 T cell clusters in either anti-CD3 antibody injected  
472 spleens and/or  $\gamma$ HV68 infected lungs. Cellular markers are ordered from greatest to  
473 least range in median expression between clusters. Data are from IL10gfp mice, using  
474 either spleens from mice that were injected with an anti-CD3 antibody (injected with  
475 antibody at 0 and 46 hours, with harvest at 50 hours, n=4 mice) or lungs from  $\gamma$ HV68  
476 infected (n=5 mice) harvested at 6 dpi.

477

478 **Figure 4. High dimensional analysis of IL-10 dependent regulation of the antiviral**  
479 **response in the lung and the colon.** Mass cytometric analysis of cells recovered the  
480 lungs (A,C,E) or colons (B,D,F) of  $\gamma$ HV68 infected B6 or IL10KO mice harvested at 9  
481 dpi. Files were normalized and gated on viable, single CD45+ cells (defined as  $^{191}\text{Ir}+$   
482  $^{193}\text{Ir}+$   $^{195}\text{Pt}-$   $^{89}\text{CD45}+$ ) prior to analysis, where numbers indicate isotopic mass for each  
483 measured parameter. (A, B) PhenoGraph analysis of CD45+ cells from (A) lungs or (B)  
484 colons of  $\gamma$ HV68 infected B6 or IL10KO mice. Clustering was done on 4,344 events per  
485 file (34,752 total), with clustering in the lung based on 34 markers (29 clusters identified,  
486 Table 4A) and clustering in the colon based on 36 markers (20 clusters identified, Table  
487 4B); lungs and colons were harvested from separate cohorts. PhenoGraph-defined



488 clusters are colored according to cluster ID. (C,D) Definition of cellular phenotypes  
489 across PhenoGraph-defined clusters, according to the indicated lineage markers, with  
490 distinct cell types given unique colors. “CD45+ MHC II+” and “CD45+ MHC II-” clusters  
491 were defined by exclusion from other phenotypes. (E,F) Identification of clusters with  
492 statistically significant differences in frequency between B6 and IL10KO infected (E)  
493 lungs and (F) colons, showing cluster frequencies (left panel) and expression for the  
494 identified parameters within the identified cluster (right panel). In the right panel of E,  
495 plotted events are CD4+ T cells identified in panel C. In the right panel of F, plotted  
496 events are the dominant CD64+ cell clusters identified in panel D. Parameters with a  
497 different maximum scale value between B6 and IL10KO are identified by italicized text  
498 and an asterisk. Data are from  $\gamma$ HV68 infected B6 and IL10KO lungs (n=4 mice per  
499 genotype) and colons (n=4 mice per genotype) harvested 9 dpi. Data depict mean  $\pm$   
500 SEM with individual symbols indicating values from independent samples. All samples  
501 were analyzed for statistical significance using unpaired t tests, corrected for multiple  
502 comparisons using the Holm-Sidak method, with statistical significance denoted as \*  
503  $p < 0.05$ , \*\*  $p < 0.01$ , \*\*\*  $p < 0.001$ .

504

505 **Figure 5. High-dimensional analysis of effector CD4 T cell function following**

506  **$\gamma$ HV68 infection in B6 and IL10KO mice.** Mass cytometric analysis of cells recovered  
507 the lungs of  $\gamma$ HV68 infected B6 or IL10KO mice harvested at 9 dpi, with cells subjected  
508 to pharmacologic stimulation for intracellular cytokine staining analysis (ICCS), using a  
509 35 antibody panel (Table 1). Files were normalized, with data gated on viable CD4 T  
510 cells, defined as  $^{191}\text{Ir}^+ \text{ }^{193}\text{Ir}^+ \text{ }^{195}\text{Pt}^- \text{ }^{152}\text{CD}3\epsilon^+ \text{ }^{172}\text{CD}4^+ \text{ }^{174}\text{MHC II}^-$  events, where numbers

511 indicate isotopic mass for each measured parameter. (A) CD4 T cells were imported  
512 into PhenoGraph and clustered on 33,022 total events (3,669 events from each file) and  
513 32 markers (excluding CD3, CD4, and MHC II, Table 1), identifying 16 unique clusters  
514 portrayed on a tSNE plot. (B) All events from panel A are colored by CD44, IFN $\gamma$ , TNF $\alpha$ ,  
515 and IL-10 expression. (C) Events from panel A colored based on their cytokine profile,  
516 stratified based on IFN $\gamma$ , TNF $\alpha$ , and IL-10 expression. (D) Frequency of CD4 T cells in  
517 virally-infected B6 and IL10KO mice. (E) Comparison of CTLA-4, GITR, ICOS, Lag3,  
518 and PD-1 expression across CD4 T cells from B6 (top row) or IL10KO (bottom row)  
519 mice, where IFN $\gamma$ + TNF $\alpha$ + CD4 T cells were identified by a green boundary line.  
520 Parameters with a different maximum scale value between B6 and IL10KO are  
521 identified by italicized text and an asterisk. Data from virally infected lungs of B6 (n=4)  
522 and IL10KO (n= 5) mice harvested 9 dpi, with cells were further stimulated with PMA  
523 and ionomycin for five hours after harvesting for ICCS. Data for B6 mice were also  
524 included in Figure 1, subjected to different clustering parameters (as outlined in Table  
525 1). Data show mean  $\pm$  SEM with individual symbols denoting individual mice, with  
526 statistical analysis done by unpaired t test, corrected for multiple comparisons using the  
527 Holm-Sidak method. Statistical significance denoted by \*\*, p<0.01 and \*\*\*, p<0.001. ns,  
528 not significant.

529 **ACKNOWLEDGEMENTS**

530 The authors acknowledge Melissa Ledezma for technical assistance, Kristina Terrell,  
531 Christine Childs, and Karen Helm for technical support for CyTOF studies including  
532 machine operation and management of the CU CyTOF antibody bank, and the CyTOF  
533 User Group at the University of Colorado Anschutz Medical Campus for their ongoing  
534 collaboration and insights.

535

536 **DISCLOSURES**

537 The authors have no financial conflicts of interest.

## REFERENCES

- 538  
539  
540 1. Longnecker, R. M., Kieff, E., Cohen, J.I. 2013. Epstein-Barr Virus. In *Fields*  
541 *Virology*, 6th ed.
- 542 2. Dittmer, D. P., and B. Damania. 2016. Kaposi sarcoma-associated herpesvirus:  
543 immunobiology, oncogenesis, and therapy. *J Clin Invest* 126: 3165-3175.
- 544 3. Barton, E., P. Mandal, and S. H. Speck. 2011. Pathogenesis and host control of  
545 gammaherpesviruses: lessons from the mouse. *Annu Rev Immunol* 29: 351-397.
- 546 4. Cesarman, E. 2014. Gammaherpesviruses and lymphoproliferative disorders.  
547 *Annu Rev Pathol* 9: 349-372.
- 548 5. Mariggio, G., S. Koch, and T. F. Schulz. 2017. Kaposi sarcoma herpesvirus  
549 pathogenesis. *Philos Trans R Soc Lond B Biol Sci* 372.
- 550 6. Rensing, M. E., M. van Gent, A. M. Gram, M. J. Hooykaas, S. J. Piersma, and E.  
551 J. Wiertz. 2015. Immune Evasion by Epstein-Barr Virus. *Curr Top Microbiol*  
552 *Immunol* 391: 355-381.
- 553 7. Hu, Z., and E. J. Usherwood. 2014. Immune escape of gamma-herpesviruses  
554 from adaptive immunity. *Rev Med Virol* 24: 365-378.
- 555 8. Saraiva, M., and A. O'Garra. 2010. The regulation of IL-10 production by immune  
556 cells. *Nat Rev Immunol* 10: 170-181.
- 557 9. Ouyang, W., S. Rutz, N. K. Crellin, P. A. Valdez, and S. G. Hymowitz. 2011.  
558 Regulation and functions of the IL-10 family of cytokines in inflammation and  
559 disease. *Annu Rev Immunol* 29: 71-109.
- 560 10. Rojas, J. M., M. Avia, V. Martin, and N. Sevilla. 2017. IL-10: A Multifunctional  
561 Cytokine in Viral Infections. *J Immunol Res* 2017: 6104054.

- 562 11. Hsu, D. H., R. de Waal Malefyt, D. F. Fiorentino, M. N. Dang, P. Vieira, J. de  
563 Vries, H. Spits, T. R. Mosmann, and K. W. Moore. 1990. Expression of  
564 interleukin-10 activity by Epstein-Barr virus protein BCRF1. *Science* 250: 830-  
565 832.
- 566 12. Moore, K. W., P. Vieira, D. F. Fiorentino, M. L. Trunstin, T. A. Khan, and T. R.  
567 Mosmann. 1990. Homology of cytokine synthesis inhibitory factor (IL-10) to the  
568 Epstein-Barr virus gene BCRF1. *Science* 248: 1230-1234.
- 569 13. Siegel, A. M., J. H. Herskowitz, and S. H. Speck. 2008. The MHV68 M2 protein  
570 drives IL-10 dependent B cell proliferation and differentiation. *PLoS Pathog* 4:  
571 e1000039.
- 572 14. Peacock, J. W., and K. L. Bost. 2001. Murine gammaherpesvirus-68-induced  
573 interleukin-10 increases viral burden, but limits virus-induced splenomegaly and  
574 leukocytosis. *Immunology* 104: 109-117.
- 575 15. Nelson, D. A., C. C. Petty, and K. L. Bost. 2009. Infection with murine  
576 gammaherpesvirus 68 exacerbates inflammatory bowel disease in IL-10-deficient  
577 mice. *Inflamm Res* 58: 881-889.
- 578 16. Molloy, M. J., W. Zhang, and E. J. Usherwood. 2011. Suppressive CD8+ T cells  
579 arise in the absence of CD4 help and compromise control of persistent virus. *J*  
580 *Immunol* 186: 6218-6226.
- 581 17. Spitzer, M. H., and G. P. Nolan. 2016. Mass Cytometry: Single Cells, Many  
582 Features. *Cell* 165: 780-791.

- 583 18. Virgin, H. W. t., P. Latreille, P. Wamsley, K. Hallsworth, K. E. Weck, A. J. Dal  
584 Canto, and S. H. Speck. 1997. Complete sequence and genomic analysis of  
585 murine gammaherpesvirus 68. *J Virol* 71: 5894-5904.
- 586 19. Adler, H., M. Messerle, M. Wagner, and U. H. Koszinowski. 2000. Cloning and  
587 mutagenesis of the murine gammaherpesvirus 68 genome as an infectious  
588 bacterial artificial chromosome. *J Virol* 74: 6964-6974.
- 589 20. Nealy, M. S., C. B. Coleman, H. Li, and S. A. Tibbetts. 2010. Use of a virus-  
590 encoded enzymatic marker reveals that a stable fraction of memory B cells  
591 expresses latency-associated nuclear antigen throughout chronic  
592 gammaherpesvirus infection. *J Virol* 84: 7523-7534.
- 593 21. Diebel, K. W., L. M. Oko, E. M. Medina, B. F. Niemeyer, C. J. Warren, D. J.  
594 Claypool, S. A. Tibbetts, C. D. Cool, E. T. Clambey, and L. F. van Dyk. 2015.  
595 Gammaherpesvirus small noncoding RNAs are bifunctional elements that  
596 regulate infection and contribute to virulence in vivo. *MBio* 6: e01670-01614.
- 597 22. Gagliani, N., C. F. Magnani, S. Huber, M. E. Gianolini, M. Pala, P. Licona-Limon,  
598 B. Guo, D. R. Herbert, A. Bulfone, F. Trentini, C. Di Serio, R. Bacchetta, M.  
599 Andreani, L. Brockmann, S. Gregori, R. A. Flavell, and M. G. Roncarolo. 2013.  
600 Coexpression of CD49b and LAG-3 identifies human and mouse T regulatory  
601 type 1 cells. *Nat Med* 19: 739-746.
- 602 23. Kimball, A. K., L. M. Oko, B. L. Bullock, R. A. Nemenoff, L. F. van Dyk, and E. T.  
603 Clambey. 2018. A Beginner's Guide to Analyzing and Visualizing Mass  
604 Cytometry Data. *J Immunol* 200: 3-22.

- 605 24. Hu, Z., M. A. Blackman, K. M. Kaye, and E. J. Usherwood. 2015. Functional  
606 heterogeneity in the CD4<sup>+</sup> T cell response to murine gamma-herpesvirus 68. *J*  
607 *Immunol* 194: 2746-2756.
- 608 25. Levine, J. H., E. F. Simonds, S. C. Bendall, K. L. Davis, A. D. Amir el, M. D.  
609 Tadmor, O. Litvin, H. G. Fienberg, A. Jager, E. R. Zunder, R. Finck, A. L.  
610 Gedman, I. Radtke, J. R. Downing, D. Pe'er, and G. P. Nolan. 2015. Data-Driven  
611 Phenotypic Dissection of AML Reveals Progenitor-like Cells that Correlate with  
612 Prognosis. *Cell* 162: 184-197.
- 613 26. Kamanaka, M., S. T. Kim, Y. Y. Wan, F. S. Sutterwala, M. Lara-Tejero, J. E.  
614 Galan, E. Harhaj, and R. A. Flavell. 2006. Expression of interleukin-10 in  
615 intestinal lymphocytes detected by an interleukin-10 reporter knockin tiger  
616 mouse. *Immunity* 25: 941-952.
- 617 27. Sun, J., R. Madan, C. L. Karp, and T. J. Braciale. 2009. Effector T cells control  
618 lung inflammation during acute influenza virus infection by producing IL-10. *Nat*  
619 *Med* 15: 277-284.
- 620 28. Weiss, K. A., A. F. Christiaansen, R. B. Fulton, D. K. Meyerholz, and S. M.  
621 Varga. 2011. Multiple CD4<sup>+</sup> T cell subsets produce immunomodulatory IL-10  
622 during respiratory syncytial virus infection. *J Immunol* 187: 3145-3154.
- 623 29. Parish, I. A., H. D. Marshall, M. M. Staron, P. A. Lang, A. Brustle, J. H. Chen, W.  
624 Cui, Y. C. Tsui, C. Perry, B. J. Laidlaw, P. S. Ohashi, C. T. Weaver, and S. M.  
625 Kaech. 2014. Chronic viral infection promotes sustained Th1-derived  
626 immunoregulatory IL-10 via BLIMP-1. *J Clin Invest* 124: 3455-3468.

- 627 30. Zhang, P., J. S. Lee, K. H. Gartlan, I. S. Schuster, I. Comerford, A. Varelias, M.  
628 A. Ullah, S. Vuckovic, M. Koyama, R. D. Kuns, K. R. Locke, K. J. Beckett, S. D.  
629 Olver, L. D. Samson, M. Montes de Oca, F. de Labastida Rivera, A. D. Clouston,  
630 G. T. Belz, B. R. Blazar, K. P. MacDonald, S. R. McColl, R. Thomas, C. R.  
631 Engwerda, M. A. Degli-Esposti, A. Kallies, S. K. Tey, and G. R. Hill. 2017.  
632 Eomesodermin promotes the development of type 1 regulatory T (TR1) cells. *Sci*  
633 *Immunol* 2.
- 634 31. Huang, W., S. Solouki, C. Carter, S. G. Zheng, and A. August. 2018. Beyond  
635 Type 1 Regulatory T Cells: Co-expression of LAG3 and CD49b in IL-10-  
636 Producing T Cell Lineages. *Front Immunol* 9: 2625.
- 637 32. Jankovic, D., D. G. Kugler, and A. Sher. 2010. IL-10 production by CD4+ effector  
638 T cells: a mechanism for self-regulation. *Mucosal Immunol* 3: 239-246.
- 639 33. Haringer, B., L. Lozza, B. Steckel, and J. Geginat. 2009. Identification and  
640 characterization of IL-10/IFN-gamma-producing effector-like T cells with  
641 regulatory function in human blood. *J Exp Med* 206: 1009-1017.
- 642 34. Gruarin, P., S. Maglie, M. De Simone, B. Haringer, C. Vasco, V. Ranzani, R.  
643 Bosotti, J. S. Noddings, P. Larghi, F. Facciotti, M. L. Sarnicola, M. Martinovic, M.  
644 Crosti, M. Moro, R. L. Rossi, M. E. Bernardo, F. Caprioli, F. Locatelli, G. Rossetti,  
645 S. Abrignani, M. Pagani, and J. Geginat. 2018. Eomesodermin controls a unique  
646 differentiation program in human IL-10 and IFN-gamma coproducing regulatory T  
647 cells. *Eur J Immunol*.
- 648 35. Sun, J., A. Cardani, A. K. Sharma, V. E. Laubach, R. S. Jack, W. Muller, and T.  
649 J. Braciale. 2011. Autocrine regulation of pulmonary inflammation by effector T-



- 650 cell derived IL-10 during infection with respiratory syncytial virus. *PLoS Pathog* 7:  
651 e1002173.
- 652 36. Brockmann, L., N. Gagliani, B. Steglich, A. D. Giannou, J. Kempinski, P. Pelczar,  
653 M. Geffken, B. Mfarrej, F. Huber, J. Herkel, Y. Y. Wan, E. Esplugues, M.  
654 Battaglia, C. F. Krebs, R. A. Flavell, and S. Huber. 2017. IL-10 Receptor  
655 Signaling Is Essential for TR1 Cell Function In Vivo. *J Immunol* 198: 1130-1141.
- 656 37. Mittal, S. K., and P. A. Roche. 2015. Suppression of antigen presentation by IL-  
657 10. *Curr Opin Immunol* 34: 22-27.
- 658 38. Ip, W. K. E., N. Hoshi, D. S. Shouval, S. Snapper, and R. Medzhitov. 2017. Anti-  
659 inflammatory effect of IL-10 mediated by metabolic reprogramming of  
660 macrophages. *Science* 356: 513-519.
- 661



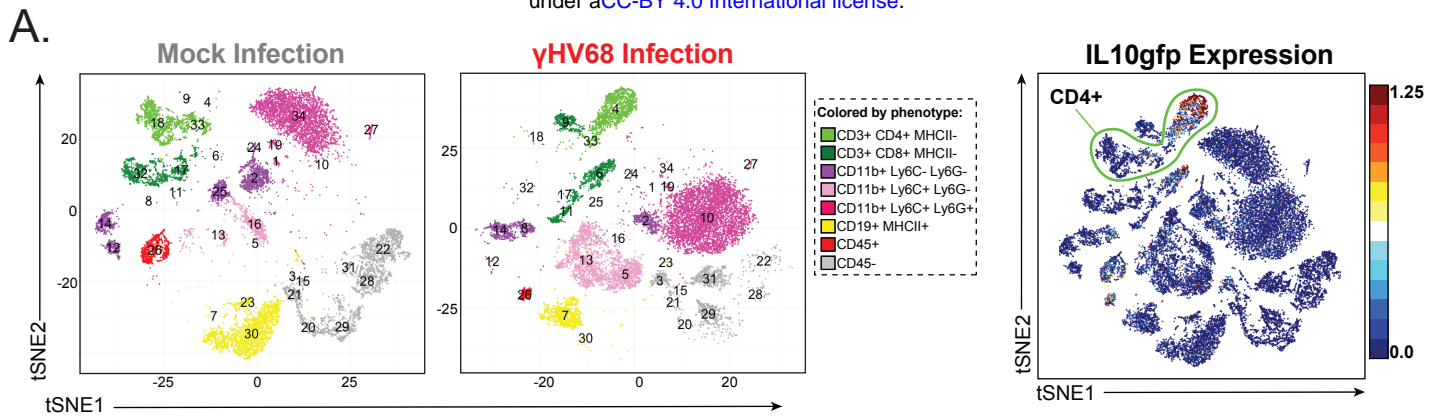

**CD4 T cells (191+ 193+ 195- CD3+ CD4+ MHCII- events)**

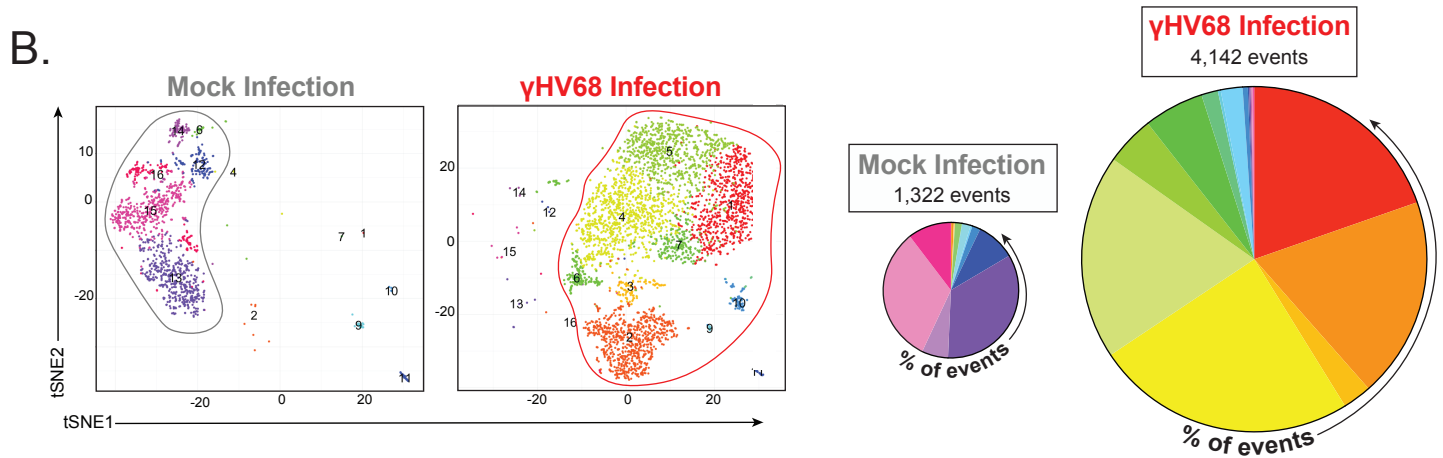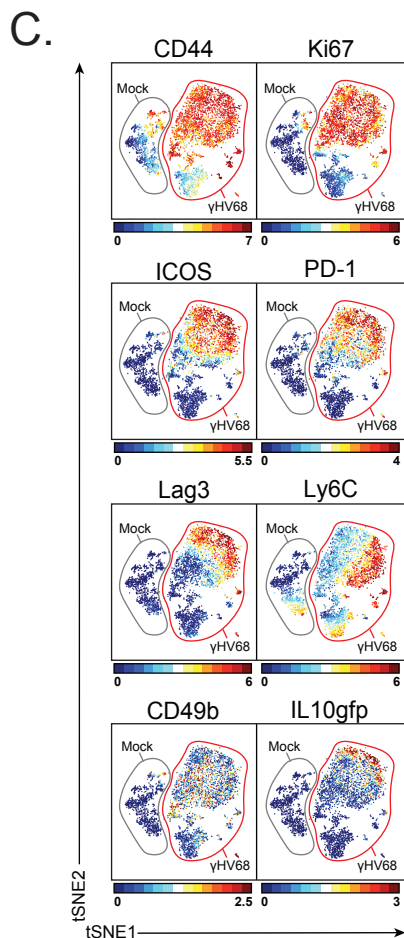

**D.**

| Enriched in mock infection |       |      |       | Enriched in γHV68 infection |       |       |       |                      |
|----------------------------|-------|------|-------|-----------------------------|-------|-------|-------|----------------------|
| Cluster ID                 |       |      |       |                             |       |       |       |                      |
| #12                        | #13   | #14  | #15   | #1                          | #2    | #4    | #5    |                      |
| Hi                         | Lo    | Hi   | Lo    | Hi                          | Mid   | Hi    | Hi    | <b>CD44</b>          |
| Hi                         | Lo    | Lo   | Lo    | Hi                          | Lo    | Hi    | Hi    | <b>Ki67</b>          |
| Lo                         | Lo    | Lo   | Lo    | Mid                         | Lo    | Mid   | Hi    | <b>ICOS</b>          |
| Lo                         | Lo    | Lo   | Lo    | Hi                          | Lo    | Mid   | Hi    | <b>PD-1</b>          |
| Lo                         | Lo    | Lo   | Lo    | Hi                          | Lo    | Lo    | Hi    | <b>Lag3</b>          |
| Lo                         | Mid   | Lo   | Lo    | Hi                          | Mid   | Mid   | Lo    | <b>Ly6C</b>          |
| Lo                         | Lo    | Mid  | Lo    | Mid                         | Lo    | Mid   | Mid   | <b>CD49b</b>         |
| -                          | -     | -    | -     | +/-                         | -     | -     | +/-   | <b>IL10gfp</b>       |
| 9.4%                       | 34.2% | 6.3% | 32.7% | 0.1%                        | 0.6%  | 0.3%  | 0.0%  | <b>% of mock</b>     |
| 0.1%                       | 0.1%  | 0.1% | 0.1%  | 19.7%                       | 18.8% | 24.5% | 19.2% | <b>% of infected</b> |

Protein Markers

**CD4 T cells (191+ 193+ 195- CD3+ CD4+ MHCII- events)**

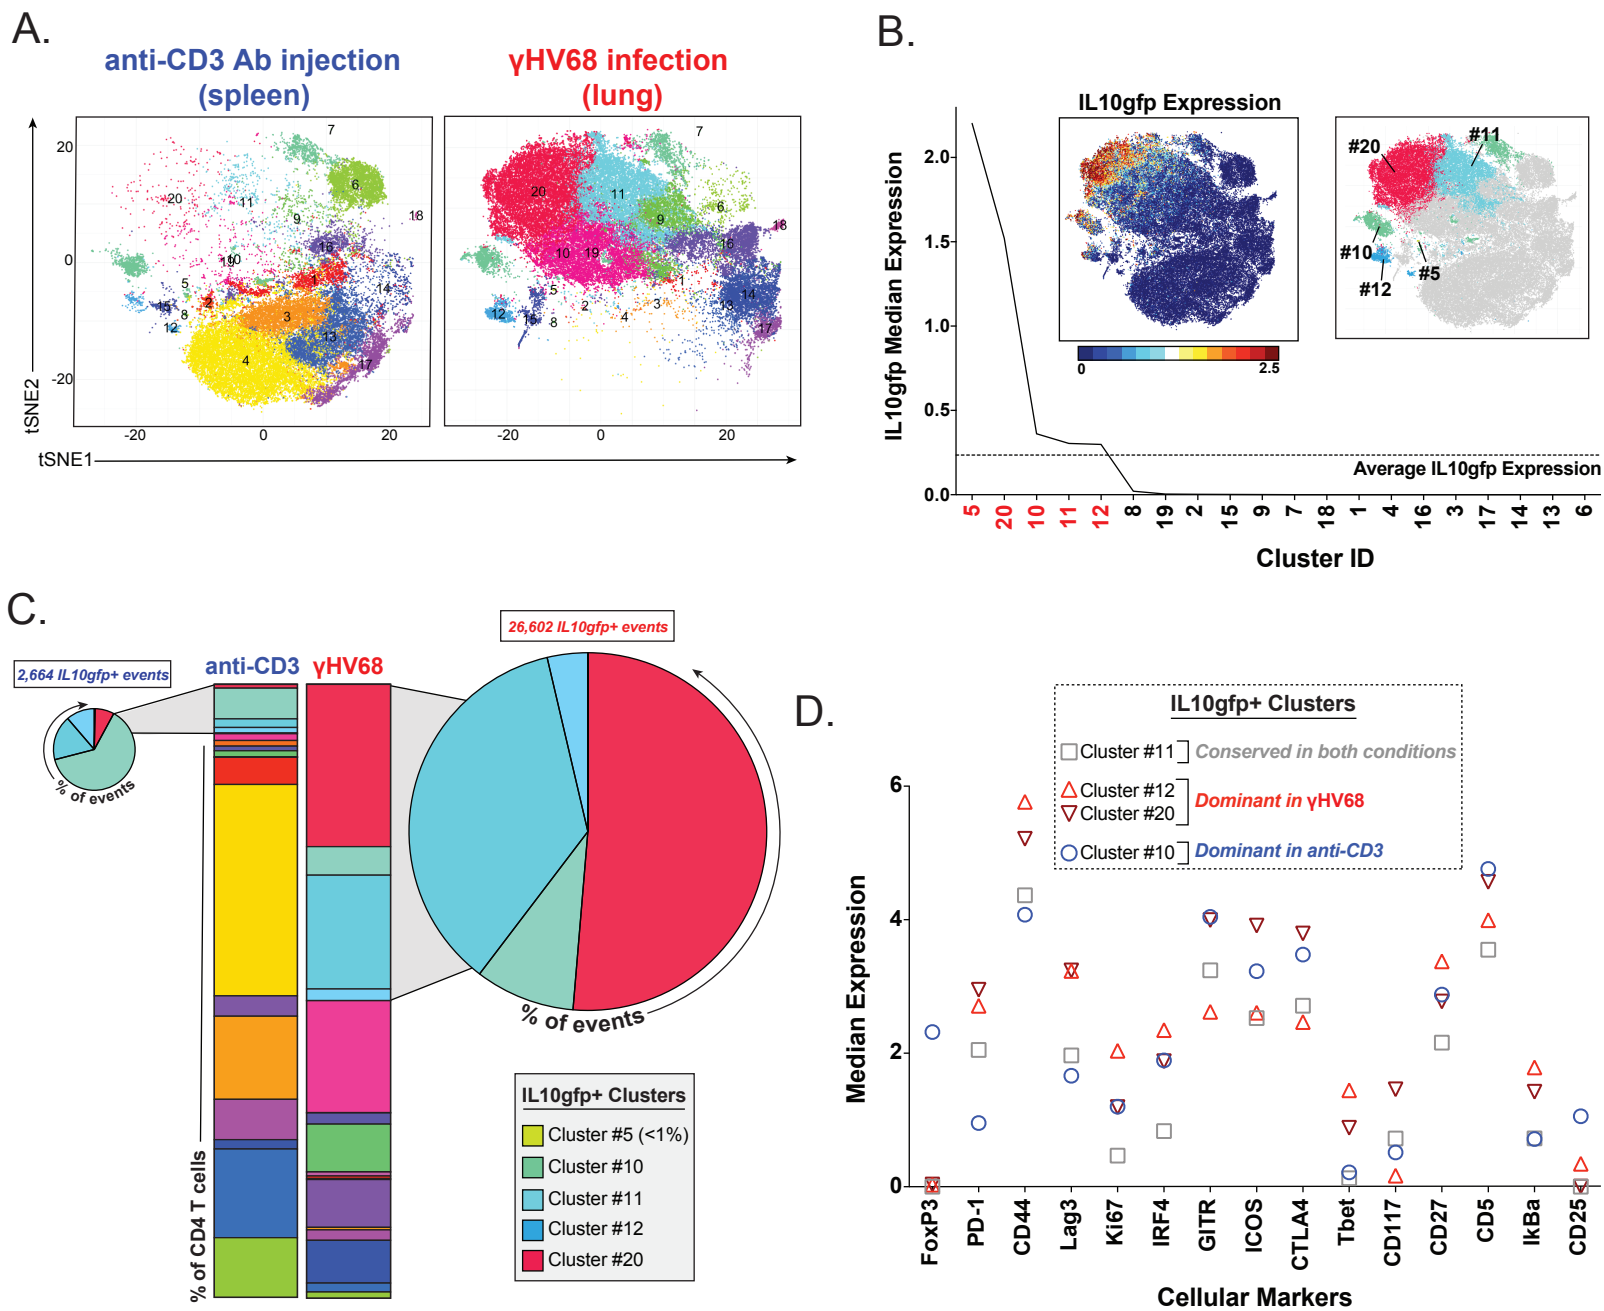

**Lung: Live, Singlet, CD45+ Events**  
(191+ 193+ 195- CD45+ events)

**Colon: Live, Singlet, CD45+ Events**  
(191+ 193+ 195- CD45+ events)

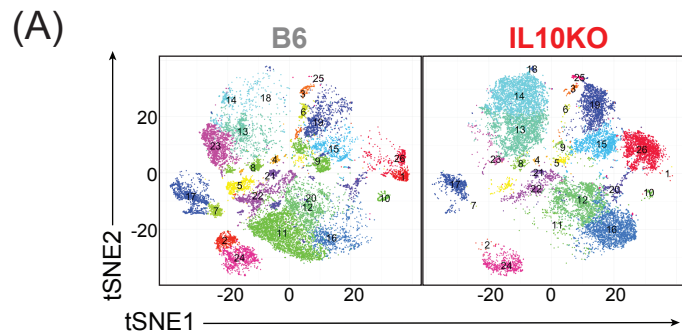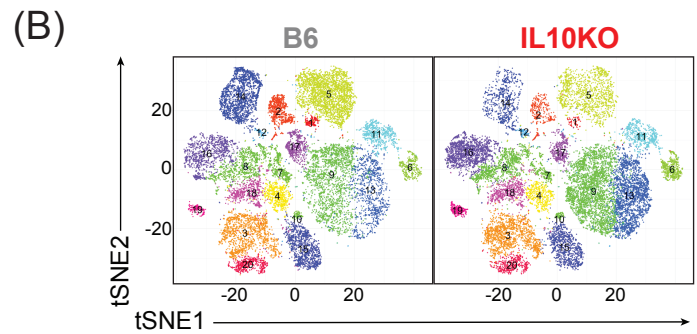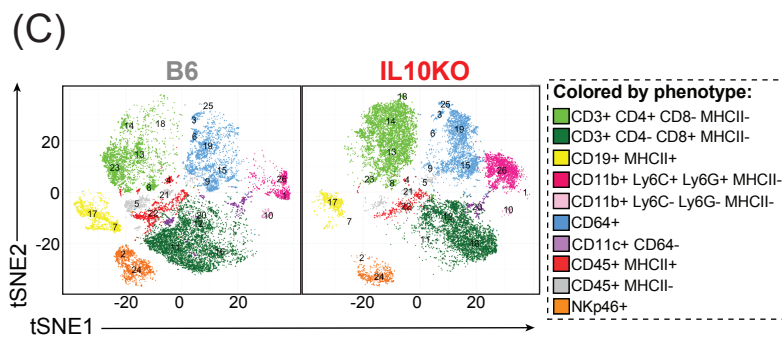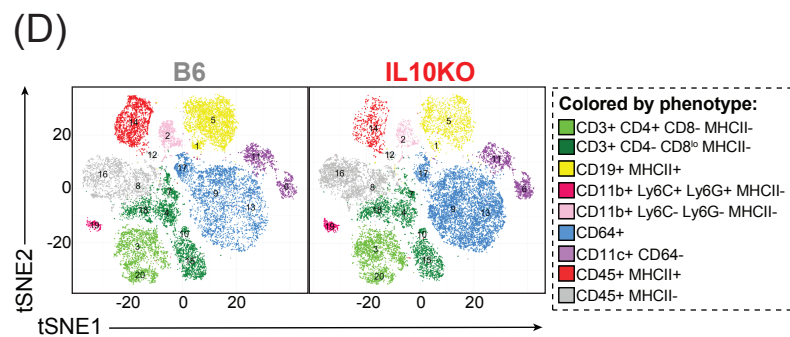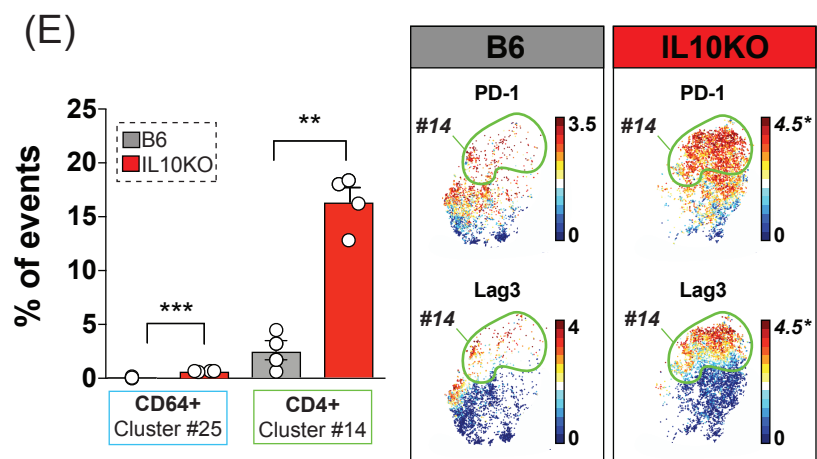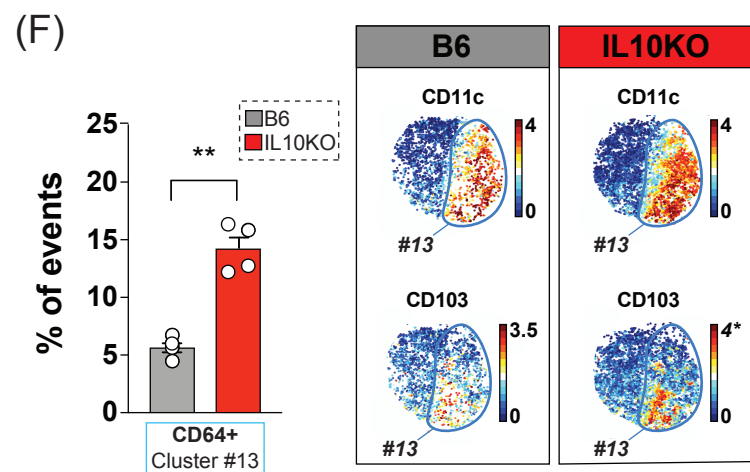

**CD4 T cells (191+ 193+ 195- CD3+ CD4+ MHCII- events), stimulated for ICCS**

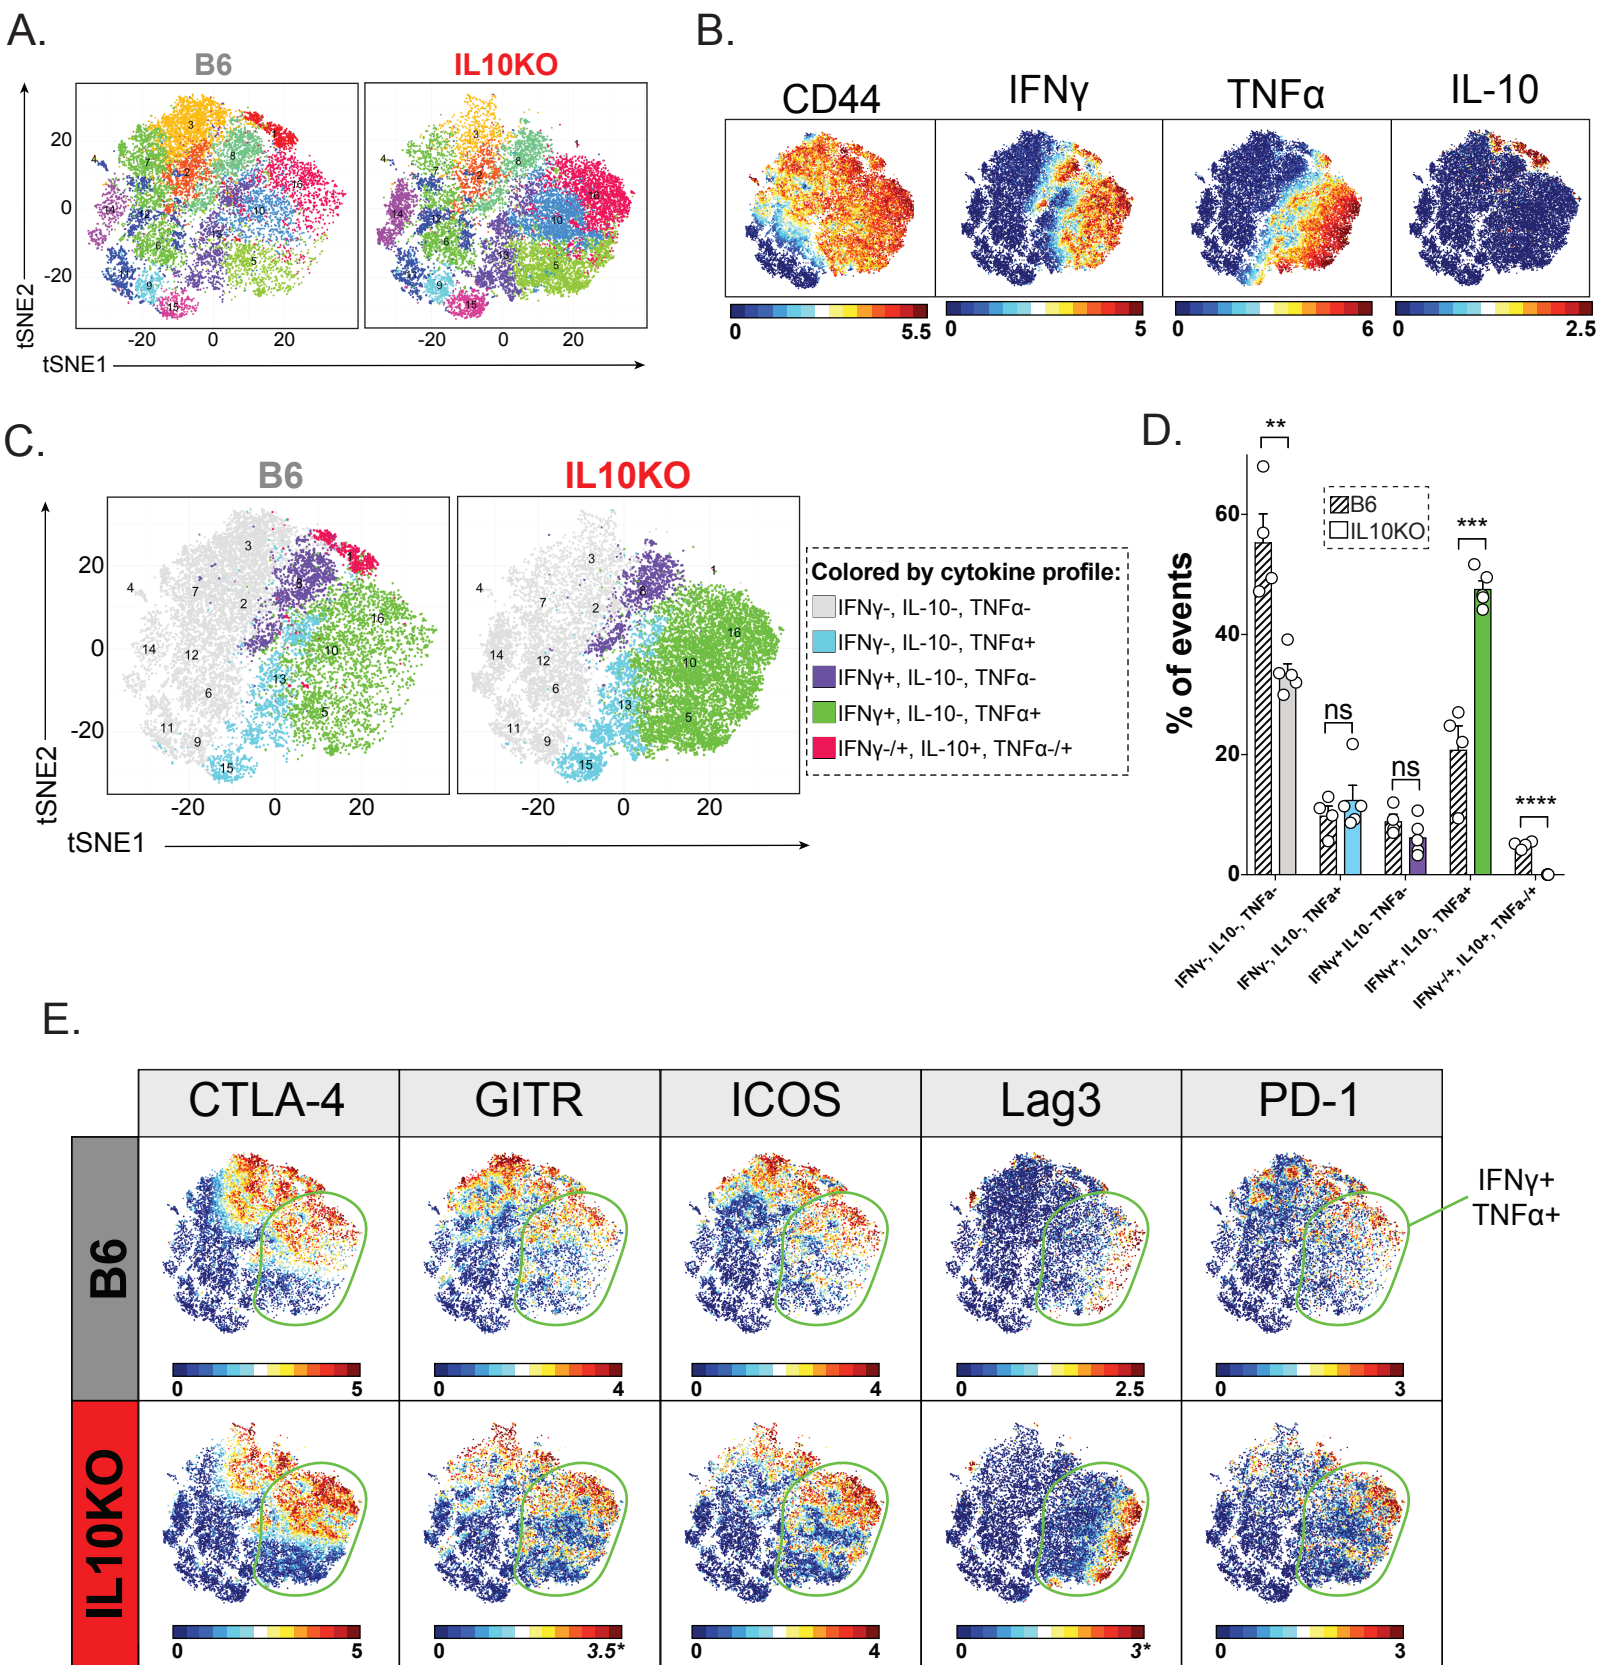

Table 1. Antibody conjugates used for the analysis in Figure 1 and 5.

| Tag                                                                                             | Target                 | Ab Clone                                   | Surface/Intracellular   | Clustering*                 |
|-------------------------------------------------------------------------------------------------|------------------------|--------------------------------------------|-------------------------|-----------------------------|
| <sup>89</sup> Y                                                                                 | CD45                   | 30-F11                                     | Surface                 | Yes                         |
| <sup>141</sup> Pr                                                                               | Gr1 (Ly6C/Ly6G)        | RB6-8C5                                    | Surface                 | Yes                         |
| <sup>142</sup> Nd                                                                               | CD11c                  | N418                                       | Surface                 | Yes                         |
| <sup>143</sup> Nd                                                                               | GITR (CD357)           | DTA1                                       | Surface                 | Yes                         |
| <sup>144</sup> Nd                                                                               | IL-2                   | JES6-5H4                                   | Intracellular           | Yes                         |
| <sup>145</sup> Nd                                                                               | CD69                   | H1.2F3                                     | Surface                 | Yes                         |
| <sup>146</sup> Nd                                                                               | CD8 $\alpha$           | 53-6.7                                     | Surface                 | Yes                         |
| <sup>148</sup> Nd                                                                               | CD11b                  | M1/70                                      | Surface                 | Yes                         |
| <sup>149</sup> Sm                                                                               | CD19                   | 6D5                                        | Surface                 | Yes                         |
| <sup>150</sup> Nd                                                                               | CD25                   | 3C7                                        | Surface                 | Yes                         |
| <sup>151</sup> Eu                                                                               | CD64                   | X54-5/7.1                                  | Surface                 | Yes                         |
| <sup>152</sup> Sm                                                                               | CD3 $\epsilon$         | 145-2C11                                   | Surface                 | No                          |
| <sup>153</sup> Eu                                                                               | PD-L1 (CD274)          | 10F.9G2                                    | Surface                 | Yes                         |
| <sup>154</sup> Sm                                                                               | CTLA4 (CD152)          | UC10-4B9                                   | Intracellular           | Yes                         |
| <sup>155</sup> Gd                                                                               | IRF4                   | 3E4                                        | Intracellular           | Yes                         |
| <sup>156</sup> Gd                                                                               | FoxP3-PE / anti-PE     | FJK-16s (Thermo Fisher) / PE001 (anti-PE)  | Intracellular/Secondary | Yes                         |
| <sup>158</sup> Gd                                                                               | IL-10                  | JES5-16E3                                  | Intracellular           | Yes                         |
| <sup>159</sup> Tb                                                                               | PD-1 (CD279)           | RMP1-30                                    | Surface                 | Yes                         |
| <sup>160</sup> Gd                                                                               | GMCSF-FITC / anti-FITC | MP1-22E9 (Pharmingen) / FIT-22 (anti-FITC) | Intracellular/Secondary | Yes                         |
| <sup>161</sup> Dy                                                                               | Tbet                   | 4B10                                       | Intracellular           | Yes                         |
| <sup>162</sup> Dy                                                                               | TNF $\alpha$           | MP6-XT22                                   | Intracellular           | No (Fig. 1)<br>Yes (Fig. 5) |
| <sup>163</sup> Dy                                                                               | Lag3-APC / anti-APC    | C9B7W (Biolegend) / APC003 (anti-APC)      | Surface/Secondary       | Yes                         |
| <sup>164</sup> Dy                                                                               | I $\kappa$ B $\alpha$  | L35A5                                      | Intracellular           | Yes                         |
| <sup>165</sup> Ho                                                                               | IFN $\gamma$           | XMG1.2                                     | Intracellular           | No (Fig. 1)<br>Yes (Fig. 5) |
| <sup>166</sup> Er                                                                               | IL-4                   | 11B11                                      | Intracellular           | Yes                         |
| <sup>167</sup> Er                                                                               | IL-6                   | MP5-20F3                                   | Intracellular           | Yes                         |
| <sup>168</sup> Er                                                                               | Ki-67                  | B56                                        | Intracellular           | Yes                         |
| <sup>169</sup> Tm                                                                               | Ly-6A/E (Sca-1)        | D7                                         | Surface                 | Yes                         |
| <sup>170</sup> Er                                                                               | NK1.1 (CD161)          | PK136                                      | Surface                 | Yes                         |
| <sup>171</sup> Yb                                                                               | CD44                   | IM7                                        | Surface                 | Yes                         |
| <sup>172</sup> Yb                                                                               | CD4                    | RM4-5                                      | Surface                 | No                          |
| <sup>173</sup> Yb                                                                               | CD117 (ckit)           | 2B8                                        | Surface                 | Yes                         |
| <sup>174</sup> Yb                                                                               | MHC class II (IA/IE)   | M5/114.15.2                                | Surface                 | No                          |
| <sup>175</sup> Lu                                                                               | CD127                  | A7R34                                      | Surface                 | Yes                         |
| <sup>176</sup> Yb                                                                               | ICOS (CD278)           | 7E.17G9                                    | Surface                 | Yes                         |
| <sup>195</sup> Pt                                                                               | Cisplatin              | Cell-ID Cisplatin                          |                         | No                          |
| <sup>191</sup> Ir, <sup>193</sup> Ir                                                            | Intercalator           | Cell-ID Intercalator-Ir                    |                         | No                          |
| <sup>140</sup> Ce <sup>151</sup> Eu<br><sup>153</sup> Eu <sup>165</sup> Ho<br><sup>175</sup> Lu | Normalization<br>Beads |                                            |                         | No                          |

\*Clustering parameters used for Figure 1 and 5 differed as indicated.

Table 2. Antibody conjugates used for the analysis in Figure 2.

| Tag                                                                                             | Target                     | Ab Clone                                 | Surface/Intracellular | Clustering*        |
|-------------------------------------------------------------------------------------------------|----------------------------|------------------------------------------|-----------------------|--------------------|
| <sup>89</sup> Y                                                                                 | CD45                       | 30-F11                                   | Surface               | Yes                |
| <sup>141</sup> Pr                                                                               | Gr1 (Ly6C/Ly6G)            | RB6-8C5                                  | Surface               | Yes                |
| <sup>142</sup> Nd                                                                               | CD11c                      | N418                                     | Surface               | Yes                |
| <sup>143</sup> Nd                                                                               | CD103-Biotin / anti-Biotin | 2E7 (Biolegend) / 1D4C3 (anti-Biotin)    | Surface               | Yes                |
| <sup>144</sup> Nd                                                                               | MHC class I                | 28-14-8                                  | Surface               | Yes                |
| <sup>145</sup> Nd                                                                               | CD69                       | H1.2F3                                   | Surface               | Yes                |
| <sup>146</sup> Nd                                                                               | CD8 $\alpha$               | 53-6.7                                   | Surface               | Yes                |
| <sup>150</sup> Nd                                                                               | CD27                       | LG.3A10                                  | Surface               | Yes                |
| <sup>151</sup> Eu                                                                               | CD25                       | 3C7                                      | Surface               | Yes                |
| <sup>152</sup> Sm                                                                               | CD3 $\epsilon$             | 145-2C11                                 | Surface               | Yes (A) / No (B-D) |
| <sup>154</sup> Sm                                                                               | CD11b                      | M1/70                                    | Surface               | Yes                |
| <sup>156</sup> Gd                                                                               | CD49b-PE / anti-PE         | HMa2 (Biolegend) / PE001 (anti-PE)       | Surface/Secondary     | Yes                |
| <sup>159</sup> Tb                                                                               | PD-1 (CD279)               | RMP1-30                                  | Surface               | Yes                |
| <sup>160</sup> Gd                                                                               | KLRG1-FITC / anti-FITC     | 2F1 (Thermo Fisher) / FIT-22 (anti-FITC) | Surface/Secondary     | Yes                |
| <sup>161</sup> Dy                                                                               | Tbet                       | 4B10                                     | Intracellular         | Yes                |
| <sup>162</sup> Dy                                                                               | Ly6C                       | HK1.4                                    | Surface               | Yes                |
| <sup>163</sup> Dy                                                                               | Lag3-APC / anti-APC        | C9B7W (Biolegend) / APC003 (anti-APC)    | Surface/Secondary     | Yes                |
| <sup>164</sup> Dy                                                                               | I $\kappa$ B $\alpha$      | L35A5                                    | Intracellular         | Yes                |
| <sup>166</sup> Er                                                                               | CD19                       | 6D5                                      | Surface               | Yes                |
| <sup>167</sup> Er                                                                               | CD150                      | TC15-12F12.2                             | Surface               | Yes                |
| <sup>168</sup> Er                                                                               | Ki-67                      | B56                                      | Intracellular         | Yes                |
| <sup>169</sup> Tm                                                                               | IL10gfp                    | 5F12.4 (anti-GFP)                        | Intracellular         | Yes                |
| <sup>170</sup> Er                                                                               | CD40L                      | MR1                                      | Surface               | Yes                |
| <sup>171</sup> Yb                                                                               | CD44                       | IM7                                      | Surface               | Yes                |
| <sup>172</sup> Yb                                                                               | CD4                        | RM4-5                                    | Surface               | Yes (A) / No (B-D) |
| <sup>173</sup> Yb                                                                               | CD117 (ckit)               | 2B8                                      | Surface               | Yes                |
| <sup>174</sup> Yb                                                                               | MHC class II (IA/IE)       | M5/114.15.2                              | Surface               | Yes (A) / No (B-D) |
| <sup>175</sup> Lu                                                                               | CD127                      | A7R34                                    | Surface               | Yes                |
| <sup>176</sup> Yb                                                                               | ICOS (CD278)               | 7E.17G9                                  | Surface               | Yes                |
| <sup>195</sup> Pt                                                                               | Cisplatin                  | Cell-ID Cisplatin                        |                       | No                 |
| <sup>191</sup> Ir, <sup>193</sup> Ir                                                            | Intercalator               | Cell-ID Intercalator-Ir                  |                       | No                 |
| <sup>140</sup> Ce <sup>151</sup> Eu<br><sup>153</sup> Eu <sup>165</sup> Ho<br><sup>175</sup> Lu | Normalization Beads        |                                          |                       | No                 |

\*Clustering parameters used for Figure 2B-D excluded CD3 $\epsilon$ , CD4, and MHC class II.



Table 3. Antibody conjugates used for the analysis in Figure 3.

| Tag                                                                                          | Target                  | Ab Clone                                  | Surface/Intracellular | Clustering |
|----------------------------------------------------------------------------------------------|-------------------------|-------------------------------------------|-----------------------|------------|
| <sup>89</sup> Y                                                                              | CD45                    | 30-F11                                    | Surface               | Yes        |
| <sup>141</sup> Pr                                                                            | pSHP2 [Y580]            | D66F10                                    | Intracellular         | Yes        |
| <sup>142</sup> Nd                                                                            | CD11c                   | N418                                      | Surface               | Yes        |
| <sup>143</sup> Nd                                                                            | GITR (CD357)            | DTA1                                      | Surface               | Yes        |
| <sup>144</sup> Nd                                                                            | CXCR3-FITC / anti-FITC  | CXCR3-173 (Biolegend)/ FIT-22 (anti-FITC) | Surface/Secondary     | Yes        |
| <sup>145</sup> Nd                                                                            | CD69                    | H1.2F3                                    | Surface               | Yes        |
| <sup>146</sup> Nd                                                                            | CD8 $\alpha$            | 53-6.7                                    | Surface               | Yes        |
| <sup>147</sup> Sm                                                                            | pHistone H2A.X (SER139) | JBW301                                    | Intracellular         | Yes        |
| <sup>148</sup> Nd                                                                            | CD11b                   | M1/70                                     | Surface               | Yes        |
| <sup>149</sup> Sm                                                                            | CD19                    | 6D5                                       | Surface               | Yes        |
| <sup>150</sup> Nd                                                                            | CD27                    | LG.3A10                                   | Surface               | Yes        |
| <sup>151</sup> Eu                                                                            | CD25                    | 3C7                                       | Surface               | Yes        |
| <sup>152</sup> Sm                                                                            | CD3 $\epsilon$          | 145-2C11                                  | Surface               | No         |
| <sup>153</sup> Eu                                                                            | PD-L1 (CD274)           | 10F.9G2                                   | Surface               | Yes        |
| <sup>154</sup> Sm                                                                            | CTLA4 (CD152)           | UC10-4B9                                  | Intracellular         | Yes        |
| <sup>155</sup> Gd                                                                            | IRF4                    | 3E4                                       | Intracellular         | Yes        |
| <sup>156</sup> Gd                                                                            | 41BB-PE / anti-PE       | 17B5 (Thermo Fisher) / PE001 (anti-PE)    | Surface/Secondary     | Yes        |
| <sup>158</sup> Gd                                                                            | FoxP3                   | FJK-16s                                   | Intracellular         | Yes        |
| <sup>159</sup> Tb                                                                            | PD-1 (CD279)            | RMP1-30                                   | Surface               | Yes        |
| <sup>160</sup> Gd                                                                            | CD5                     | 53-7.3                                    | Surface               | Yes        |
| <sup>161</sup> Dy                                                                            | Tbet                    | 4B10                                      | Intracellular         | Yes        |
| <sup>162</sup> Dy                                                                            | Tim3 (CD366)            | RMT3-23                                   | Surface               | Yes        |
| <sup>163</sup> Dy                                                                            | BCL6                    | K112-91                                   | Intracellular         | Yes        |
| <sup>164</sup> Dy                                                                            | I $\kappa$ B $\alpha$   | L35A5                                     | Intracellular         | Yes        |
| <sup>165</sup> Ho                                                                            | Beta-catenin (active)   | D13A1                                     | Intracellular         | Yes        |
| <sup>166</sup> Er                                                                            | Arginase-1              | Polyclonal                                | Intracellular         | Yes        |
| <sup>167</sup> Er                                                                            | Gata3                   | TWAJ                                      | Intracellular         | Yes        |
| <sup>168</sup> Er                                                                            | Ki-67                   | B56                                       | Intracellular         | Yes        |
| <sup>169</sup> Tm                                                                            | IL10gfp                 | 5F12.4 (anti-GFP)                         | Intracellular         | Yes        |
| <sup>170</sup> Er                                                                            | CD49b                   | HMa2                                      | Surface               | Yes        |
| <sup>171</sup> Yb                                                                            | CD44                    | IM7                                       | Surface               | Yes        |
| <sup>172</sup> Yb                                                                            | CD4                     | RM4-5                                     | Surface               | No         |
| <sup>173</sup> Yb                                                                            | CD117 (ckit)            | 2B8                                       | Surface               | Yes        |
| <sup>174</sup> Yb                                                                            | Lag3 (CD223)            | C9B7W                                     | Surface               | Yes        |
| <sup>175</sup> Lu                                                                            | CD127                   | A7R34                                     | Surface               | Yes        |
| <sup>176</sup> Yb                                                                            | ICOS (CD278)            | 7E.17G9                                   | Surface               | Yes        |
| <sup>209</sup> Bi                                                                            | MHC class II (IA/IE)    | M5/114.15.2                               | Surface               | No         |
| <sup>195</sup> Pt                                                                            | Cisplatin               | Cell-ID Cisplatin                         |                       | No         |
| <sup>191</sup> Ir, <sup>193</sup> Ir                                                         | Intercalator            | Cell-ID Intercalator-Ir                   |                       | No         |
| <sup>140</sup> Ce <sup>151</sup> Eu <sup>153</sup> Eu<br><sup>165</sup> Ho <sup>175</sup> Lu | Normalization Beads     |                                           |                       | No         |

Table 4A. Antibody conjugates used for the analysis in the lung (Figures 4A, 4C, and 4E).

| Tag                                                                                          | Target                     | Ab Clone                                   | Surface/Intracellular | Clustering |
|----------------------------------------------------------------------------------------------|----------------------------|--------------------------------------------|-----------------------|------------|
| <sup>89</sup> Y                                                                              | CD45                       | 30-F11                                     | Surface               | No         |
| <sup>141</sup> Pr                                                                            | Gr-1 (Ly6C/Ly6G)           | RB6-8C5                                    | Surface               | Yes        |
| <sup>142</sup> Nd                                                                            | CD11c                      | N418                                       | Surface               | Yes        |
| <sup>143</sup> Nd                                                                            | GITR (CD357)               | DTA1                                       | Surface               | Yes        |
| <sup>144</sup> Nd                                                                            | MHC class I                | 28-14-8                                    | Surface               | Yes        |
| <sup>145</sup> Nd                                                                            | CD69                       | H1.2F3                                     | Surface               | Yes        |
| <sup>146</sup> Nd                                                                            | CD8 $\alpha$               | 53-6.7                                     | Surface               | Yes        |
| <sup>148</sup> Nd                                                                            | CD11b                      | M1/70                                      | Surface               | Yes        |
| <sup>149</sup> Sm                                                                            | p4E-BP1 [T37/T46]          | 236B4                                      | Intracellular         | Yes        |
| <sup>150</sup> Nd                                                                            | CD25                       | 3C7                                        | Surface               | Yes        |
| <sup>151</sup> Eu                                                                            | CD64                       | X54-5/7.1                                  | Surface               | Yes        |
| <sup>152</sup> Sm                                                                            | CD3 $\epsilon$             | 145-2C11                                   | Surface               | Yes        |
| <sup>153</sup> Eu                                                                            | PD-L1 (CD274)              | 10F.9G2                                    | Surface               | Yes        |
| <sup>154</sup> Sm                                                                            | CTLA4 (CD152)              | UC10-4B9                                   | Intracellular         | Yes        |
| <sup>155</sup> Gd                                                                            | IRF4                       | 3E4                                        | Intracellular         | Yes        |
| <sup>156</sup> Gd                                                                            | Siglec-F-PE / anti-PE      | E50-2440 (BD Pharmingen) / PE001 (anti-PE) | Surface/Secondary     | Yes        |
| <sup>158</sup> Gd                                                                            | FoxP3                      | FJK-16s                                    | Intracellular         | Yes        |
| <sup>159</sup> Tb                                                                            | PD-1 (CD279)               | RMP1-30                                    | Surface               | Yes        |
| <sup>160</sup> Gd                                                                            | KLRG1-FITC / anti-FITC     | 2F1 (Thermo Fisher) / FIT-22 (anti-FITC)   | Surface/Secondary     | Yes        |
| <sup>161</sup> Dy                                                                            | Tbet                       | 4B10                                       | Intracellular         | Yes        |
| <sup>162</sup> Dy                                                                            | Tim3 (CD366)               | RMT3-23                                    | Surface               | Yes        |
| <sup>163</sup> Dy                                                                            | Lag3-APC / anti-APC        | C9B7W (Biolegend) / APC003 (anti-APC)      | Surface/Secondary     | Yes        |
| <sup>164</sup> Dy                                                                            | I $\kappa$ B $\alpha$      | L35A5                                      | Intracellular         | Yes        |
| <sup>165</sup> Ho                                                                            | Beta-catenin (active)      | D13A1                                      | Intracellular         | Yes        |
| <sup>166</sup> Er                                                                            | CD19                       | 6D5                                        | Surface               | Yes        |
| <sup>167</sup> Er                                                                            | NKp46                      | 29A1.4                                     | Surface               | Yes        |
| <sup>168</sup> Er                                                                            | Ki-67                      | B56                                        | Intracellular         | Yes        |
| <sup>169</sup> Tm                                                                            | Ly-6A/E (Sca-1)            | D7                                         | Surface               | Yes        |
| <sup>170</sup> Er                                                                            | PD-L2-Biotin / anti-Biotin | TY25 (Biolegend) / 1D4-C5 (anti-Biotin)    | Surface/Secondary     | Yes        |
| <sup>171</sup> Yb                                                                            | CD44                       | IM7                                        | Surface               | Yes        |
| <sup>172</sup> Yb                                                                            | CD4                        | RM4-5                                      | Surface               | Yes        |
| <sup>173</sup> Yb                                                                            | CD117 (ckit)               | 2B8                                        | Surface               | Yes        |
| <sup>174</sup> Yb                                                                            | MHC class II (IA/IE)       | M5/114.15.2                                | Surface               | Yes        |
| <sup>175</sup> Lu                                                                            | CD127                      | A7R34                                      | Surface               | Yes        |
| <sup>176</sup> Yb                                                                            | ICOS                       | 7E.17G9                                    | Surface               | Yes        |
| <sup>195</sup> Pt                                                                            | Cisplatin                  | Cell-ID Cisplatin                          |                       | No         |
| <sup>191</sup> Ir, <sup>193</sup> Ir                                                         | Intercalator               | Cell-ID Intercalator-Ir                    |                       | No         |
| <sup>140</sup> Ce <sup>151</sup> Eu <sup>153</sup> Eu<br><sup>165</sup> Ho <sup>175</sup> Lu | Normalization Beads        |                                            |                       | No         |

Table 4B. Antibody conjugates used for the analysis in the colon (Figures 4B, 4D, and 4F).

| Tag                                                                                          | Target                     | Ab Clone                                   | Surface/Intracellular | Clustering |
|----------------------------------------------------------------------------------------------|----------------------------|--------------------------------------------|-----------------------|------------|
| <sup>89</sup> Y                                                                              | CD45                       | 30-F11                                     | Surface               | No         |
| <sup>141</sup> Pr                                                                            | Ly6G                       | 1A8                                        | Surface               | Yes        |
| <sup>142</sup> Nd                                                                            | CD11c                      | N418                                       | Surface               | Yes        |
| <sup>143</sup> Nd                                                                            | CD103-Biotin / anti-Biotin | 2E7 (Biolegend) / 1D4C3 (anti-Biotin)      | Surface/Secondary     | Yes        |
| <sup>144</sup> Nd                                                                            | MHC class I                | 28-14-8                                    | Surface               | Yes        |
| <sup>145</sup> Nd                                                                            | SiglecF-PE / anti-PE       | E50-2440 (BD Pharmingen) / PE001 (anti-PE) | Surface/Secondary     | Yes        |
| <sup>146</sup> Nd                                                                            | CD8 $\alpha$               | 53-6.7                                     | Surface               | Yes        |
| <sup>148</sup> Nd                                                                            | CD11b                      | M1/70                                      | Surface               | Yes        |
| <sup>149</sup> Sm                                                                            | CD19                       | 6D5                                        | Surface               | Yes        |
| <sup>150</sup> Nd                                                                            | CD25                       | 3C7                                        | Surface               | Yes        |
| <sup>151</sup> Eu                                                                            | CD64                       | X54-5/7.1                                  | Surface               | Yes        |
| <sup>152</sup> Sm                                                                            | CD3 $\epsilon$             | 145-2C11                                   | Surface               | Yes        |
| <sup>153</sup> Eu                                                                            | PD-L1 (CD274)              | 10F.9G2                                    | Surface               | Yes        |
| <sup>154</sup> Sm                                                                            | CTLA4 (CD152)              | UC10-4B9                                   | Intracellular         | Yes        |
| <sup>155</sup> Gd                                                                            | IRF4                       | 3E4                                        | Intracellular         | Yes        |
| <sup>156</sup> Gd                                                                            | CD90.2                     | 30-H12                                     | Surface               | Yes        |
| <sup>158</sup> Gd                                                                            | FoxP3                      | FJK-16s                                    | Intracellular         | Yes        |
| <sup>159</sup> Tb                                                                            | ROR $\gamma$ t             | B2D                                        | Intracellular         | Yes        |
| <sup>160</sup> Gd                                                                            | CXCR3-FITC / anti-FITC     | CXCR3-173 (Biolegend) / FIT-22 (anti-FITC) | Surface/Secondary     | Yes        |
| <sup>161</sup> Dy                                                                            | Tbet                       | 4B10                                       | Intracellular         | Yes        |
| <sup>162</sup> Dy                                                                            | Ly6C                       | HK1.4                                      | Surface               | Yes        |
| <sup>163</sup> Dy                                                                            | F4/80-APC / anti-APC       | MB8 (Thermo Fisher) / APC003 (anti-APC)    | Surface/Secondary     | Yes        |
| <sup>164</sup> Dy                                                                            | I $\kappa$ B $\alpha$      | L35A5                                      | Intracellular         | Yes        |
| <sup>165</sup> Ho                                                                            | Beta-catenin (active)      | D13A1                                      | Intracellular         | Yes        |
| <sup>166</sup> Er                                                                            | Arginase-1                 | Polyclonal                                 | Intracellular         | Yes        |
| <sup>167</sup> Er                                                                            | NKp46                      | 29A1.4                                     | Surface               | Yes        |
| <sup>168</sup> Er                                                                            | Ki-67                      | B56                                        | Intracellular         | Yes        |
| <sup>169</sup> Tm                                                                            | Ly-6A/E (Sca-1)            | D7                                         | Surface               | Yes        |
| <sup>170</sup> Er                                                                            | CD49b                      | HMa2                                       | Surface               | Yes        |
| <sup>171</sup> Yb                                                                            | CD44                       | IM7                                        | Surface               | Yes        |
| <sup>172</sup> Yb                                                                            | CD4                        | RM4-5                                      | Surface               | Yes        |
| <sup>173</sup> Yb                                                                            | CD117 (ckit)               | 2B8                                        | Surface               | Yes        |
| <sup>174</sup> Yb                                                                            | Lag3 (CD223)               | C9B7W                                      | Surface               | Yes        |
| <sup>175</sup> Lu                                                                            | CD127                      | A7R34                                      | Surface               | Yes        |
| <sup>176</sup> Yb                                                                            | ICOS (CD278)               | 7E.17G9                                    | Surface               | Yes        |
| <sup>209</sup> Bi                                                                            | MHC class II (IA/IE)       | M5/114.15.2                                | Surface               | Yes        |
| <sup>195</sup> Pt                                                                            | Cisplatin                  | Cell-ID Cisplatin                          |                       | No         |
| <sup>191</sup> Ir, <sup>193</sup> Ir                                                         | Intercalator               | Cell-ID Intercalator-Ir                    |                       | No         |
| <sup>140</sup> Ce <sup>151</sup> Eu<br><sup>153</sup> Eu <sup>165</sup> Ho <sup>175</sup> Lu | Normalization Beads        |                                            |                       | No         |
